# Supplementary material for: p16INK4a Plays Critical Role in Exacerbating Inflammaging in High Fat Diet Induced Skin
Source: Hindawi journal article supplement (doi:10.1155/2022/3415528), 2022-01-01

# Figure S1 High fat diet causes aging and fibrosis in skin

**A**

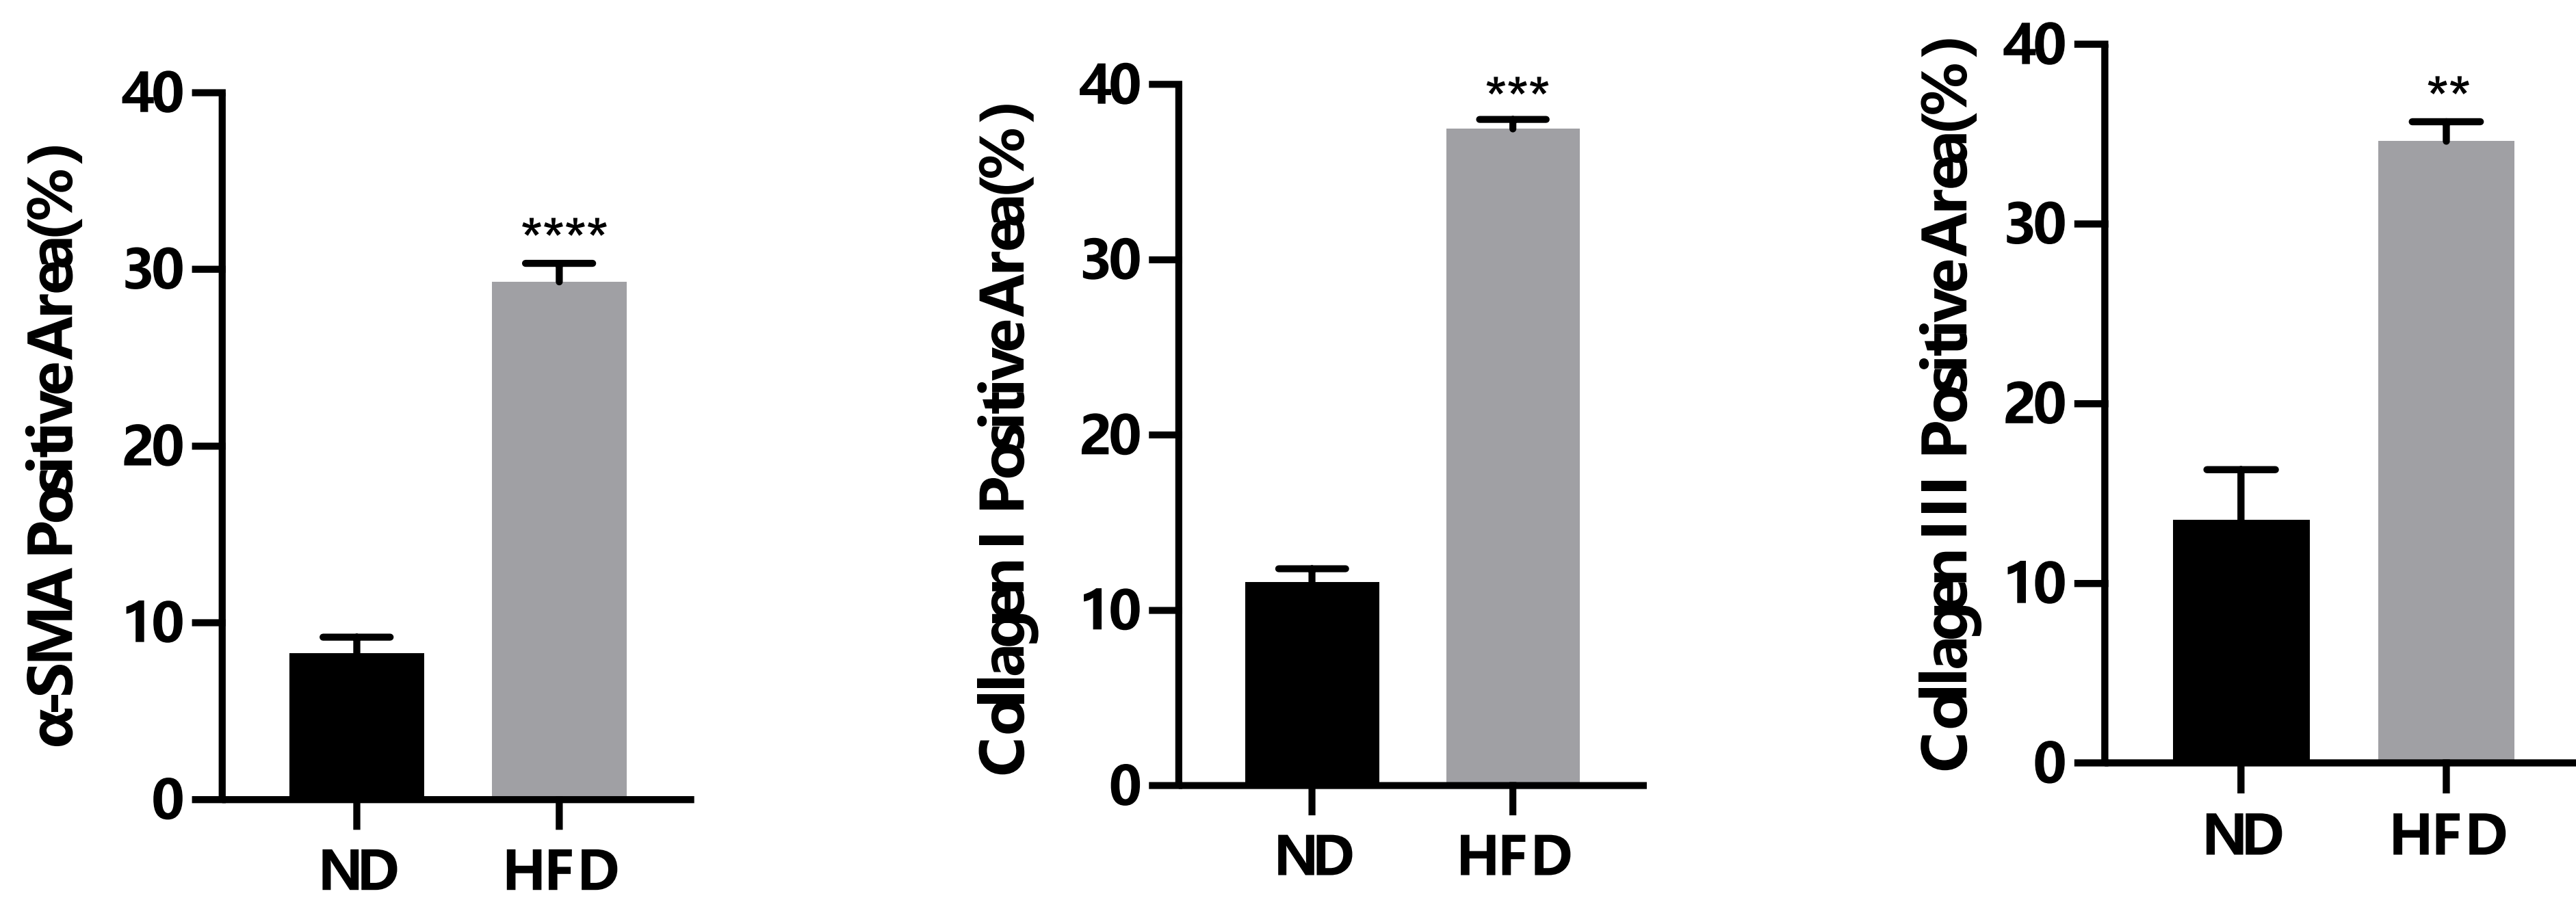

**B**

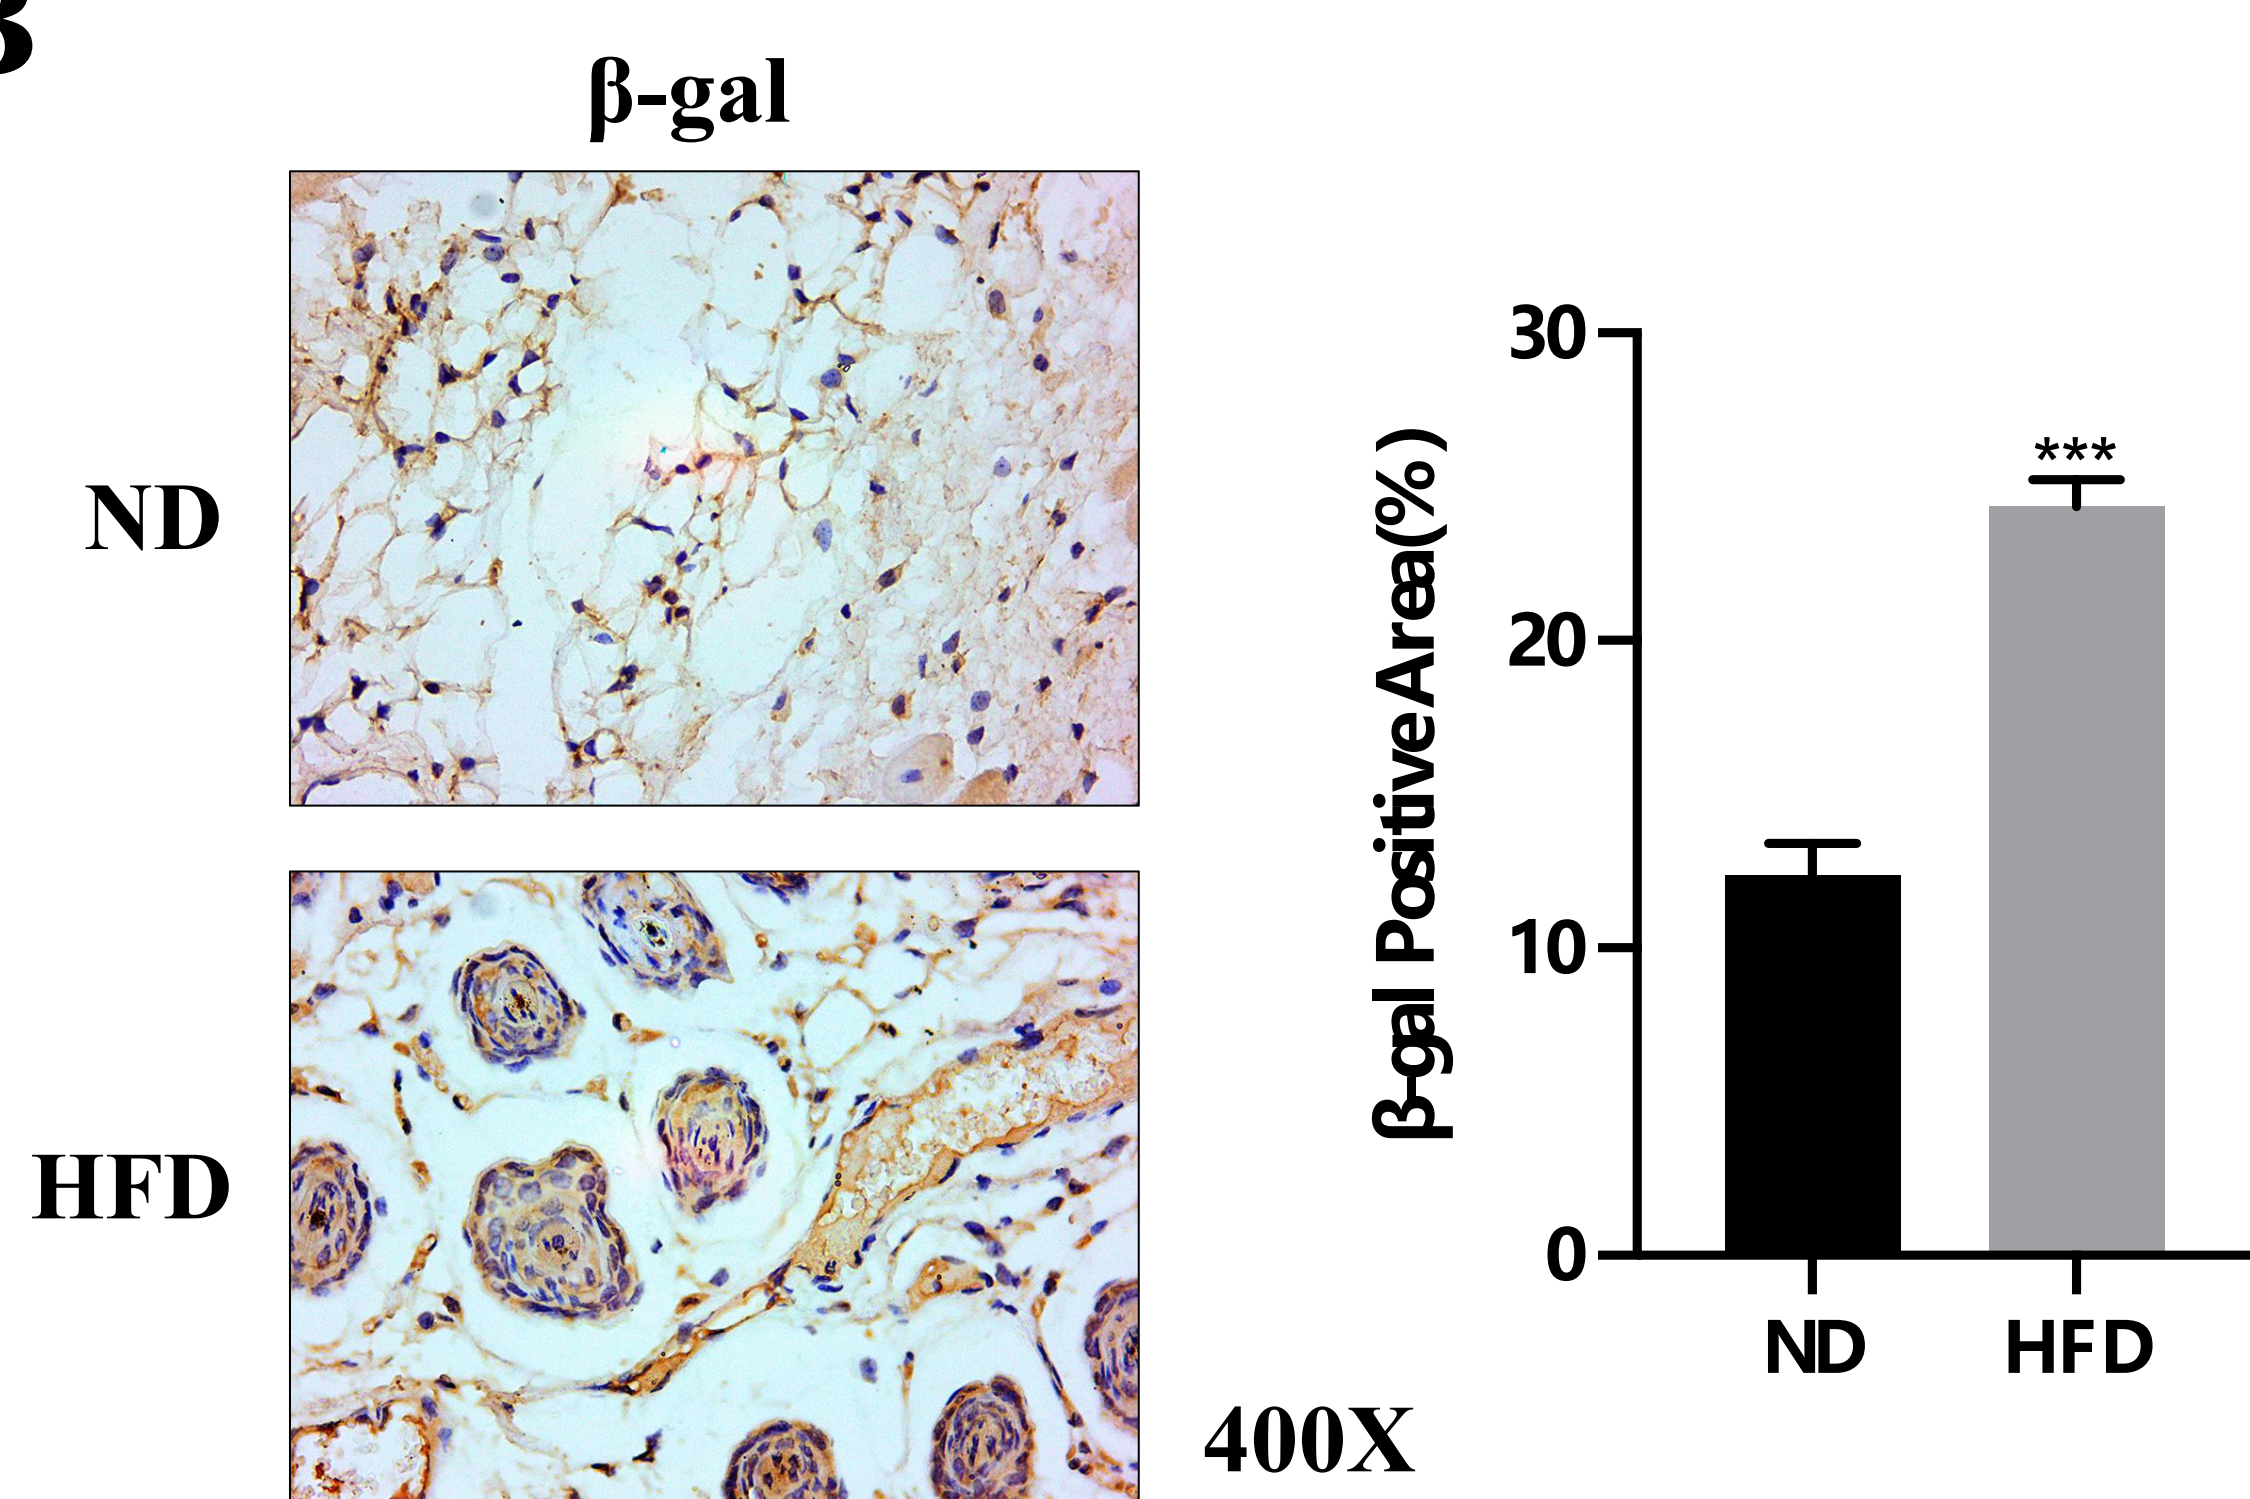

**C**

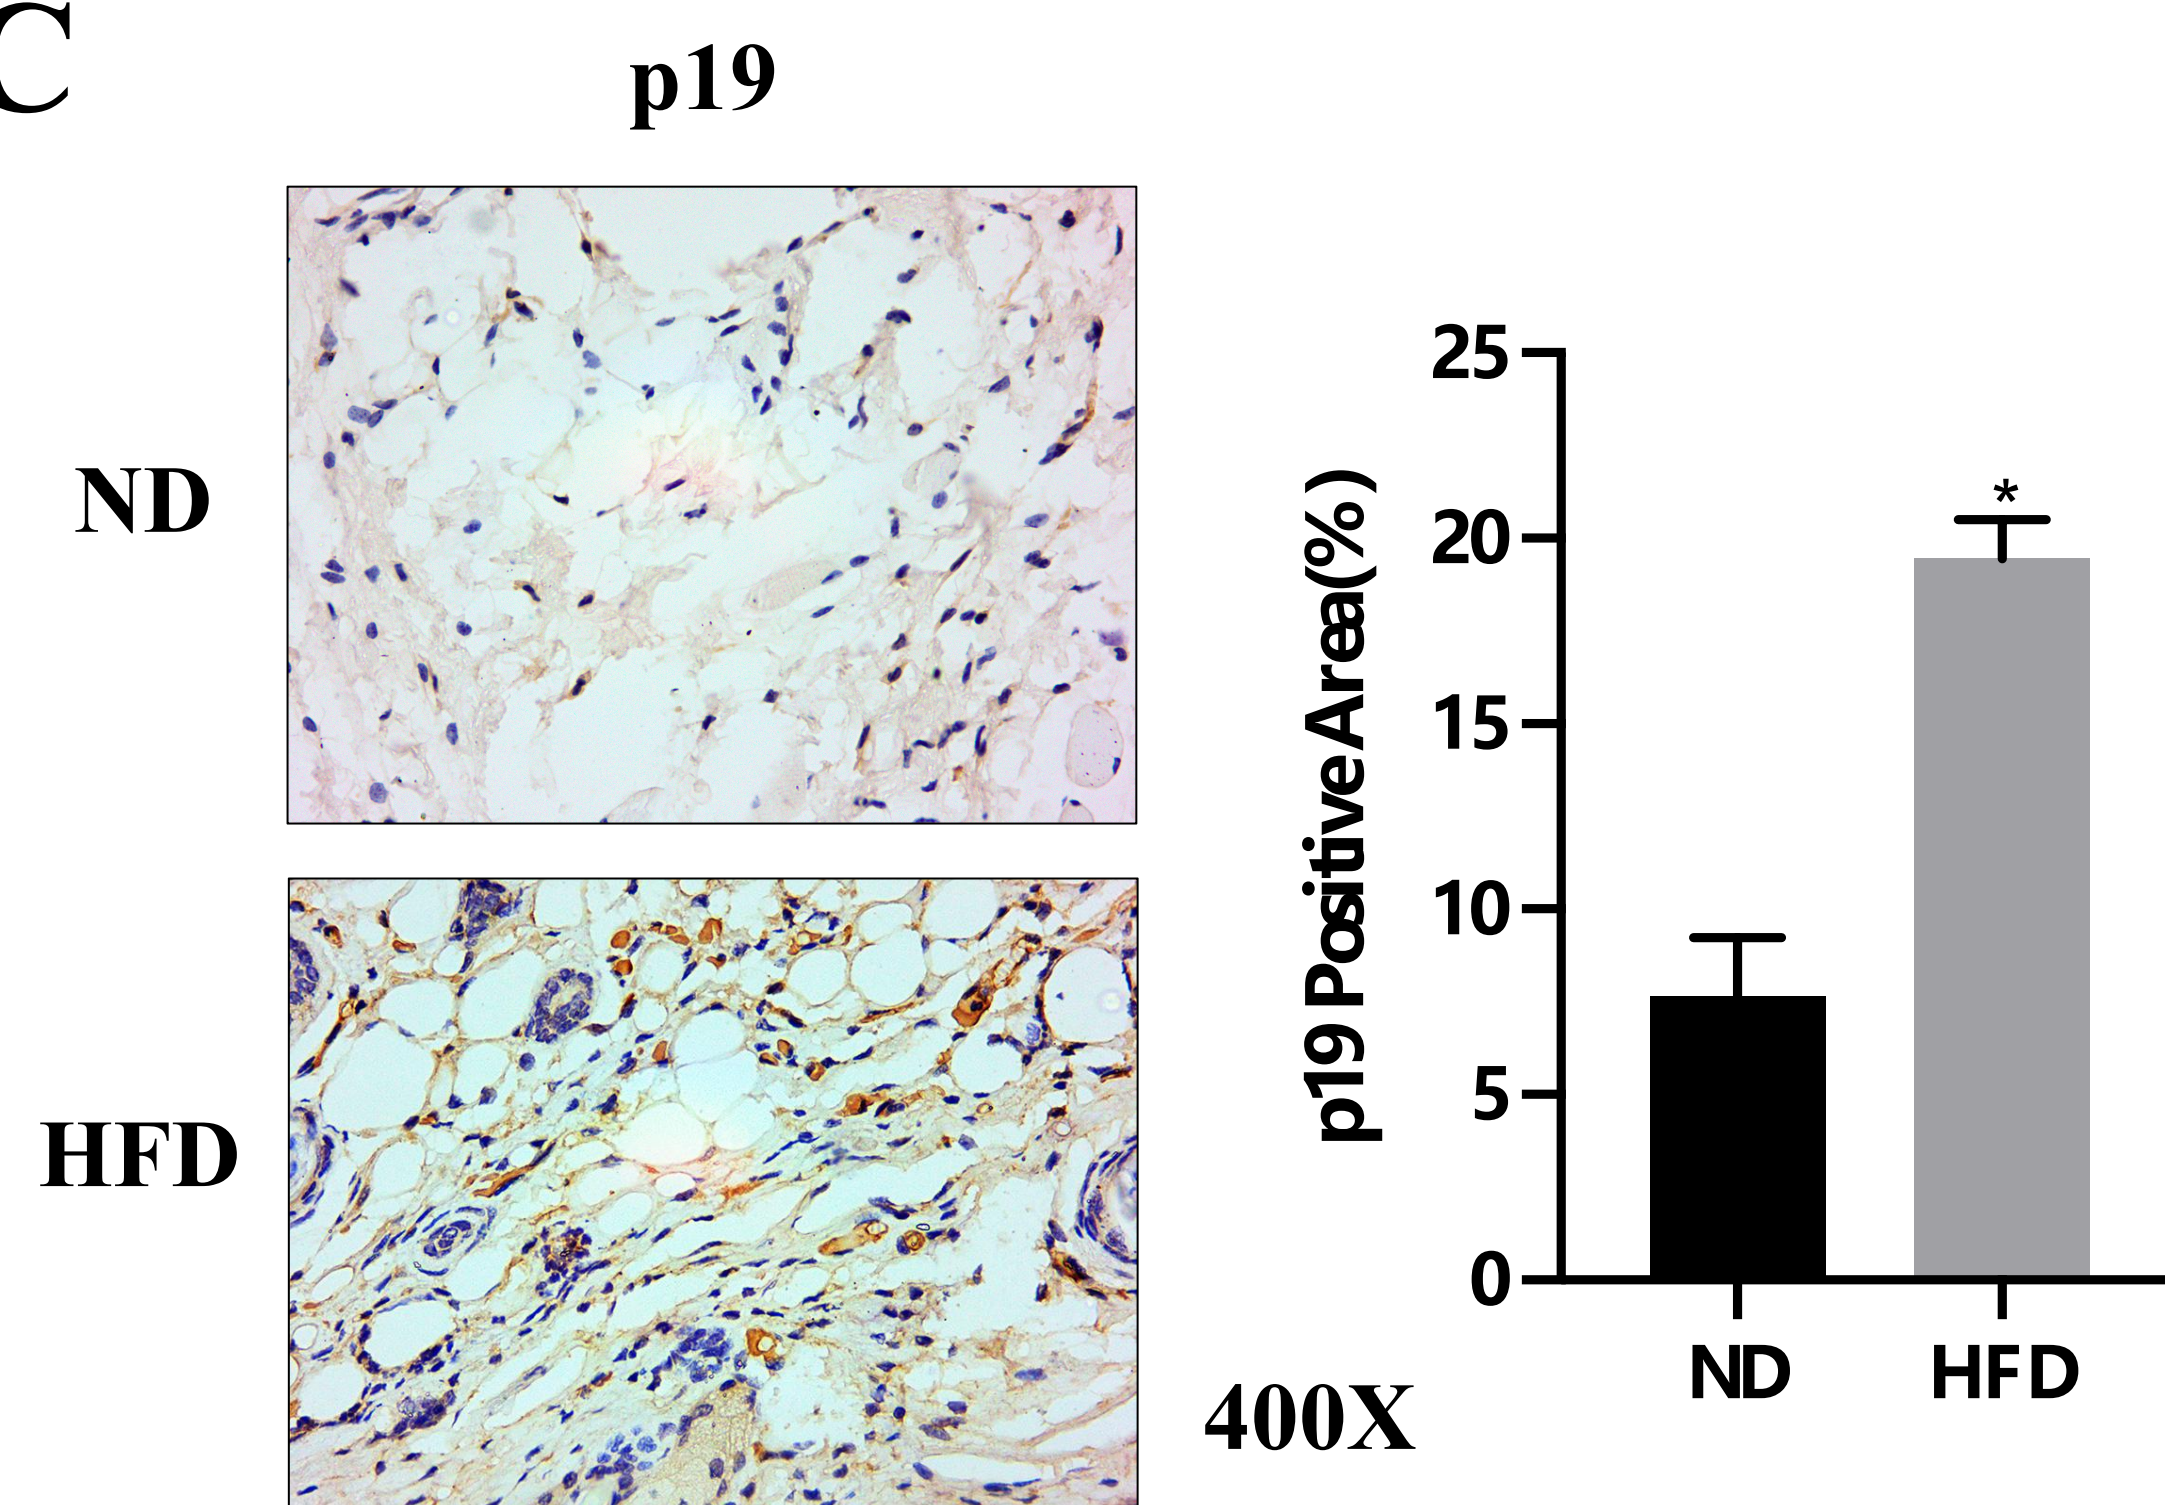

**D**

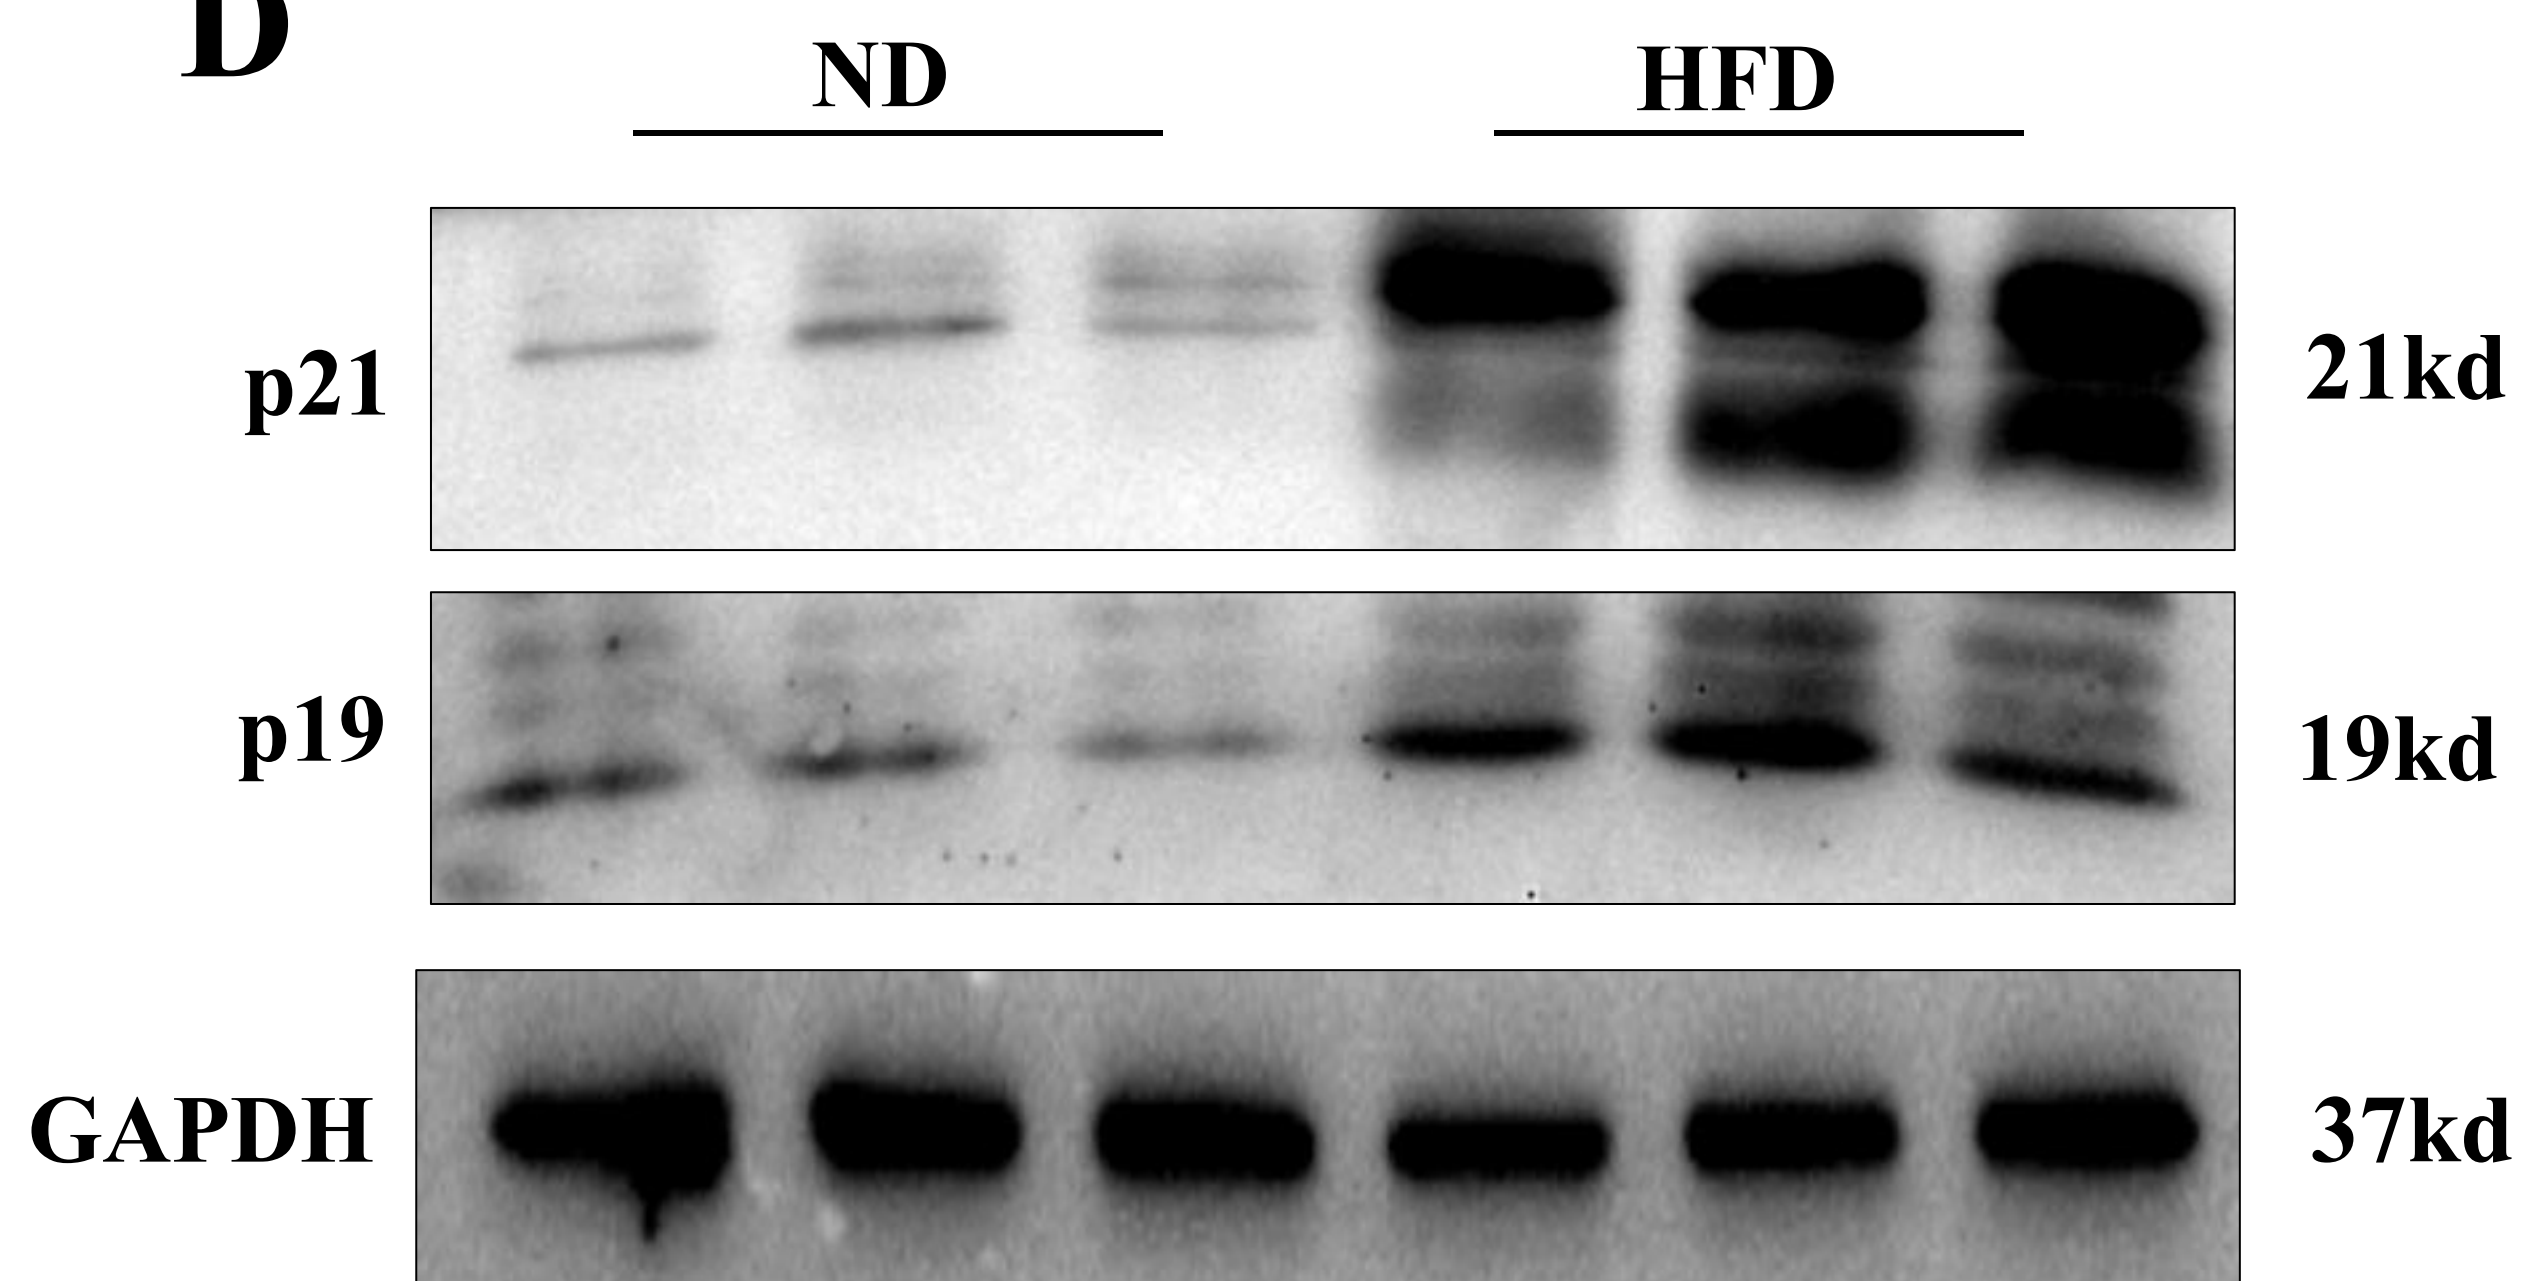

**E**

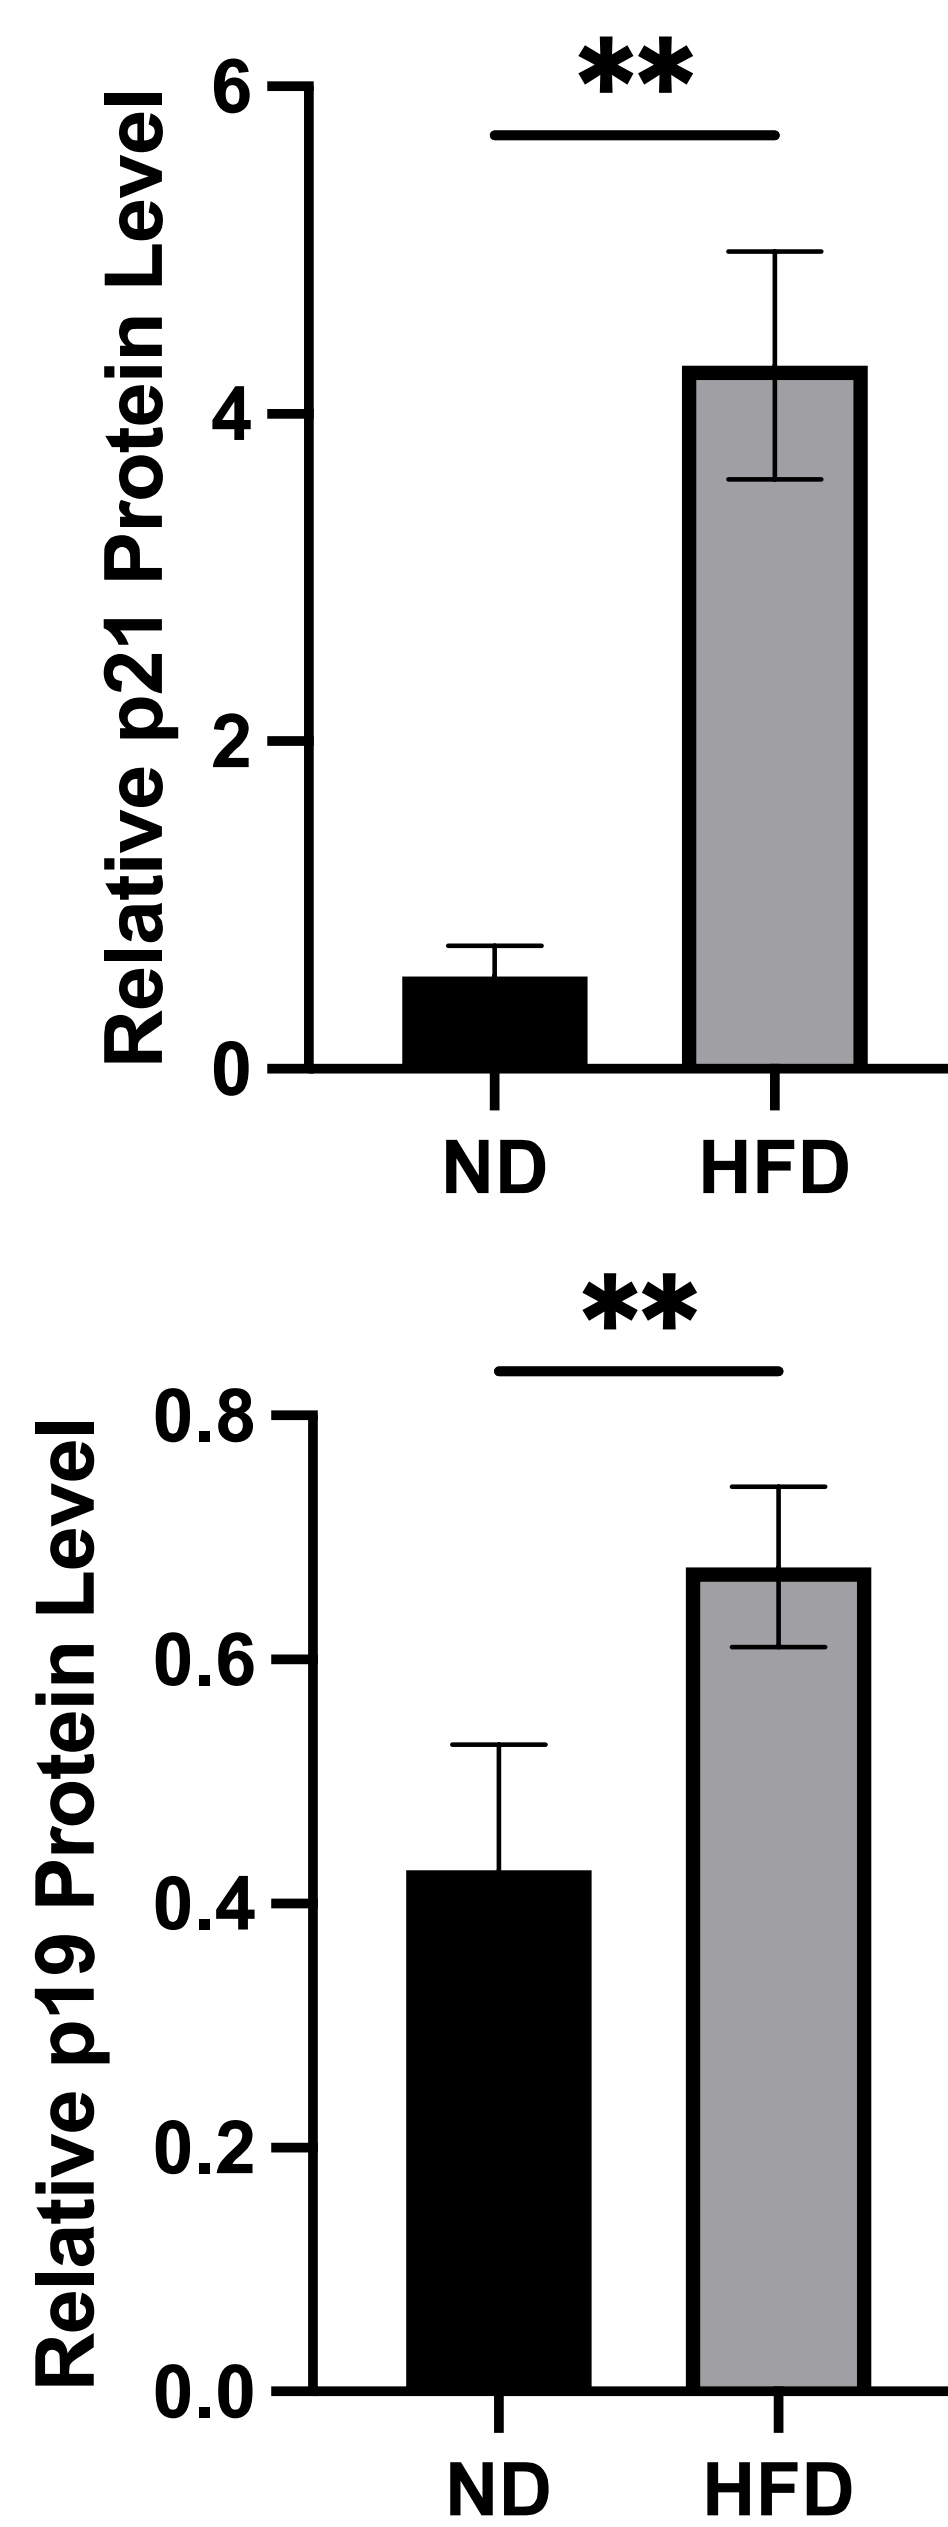

Supplement: f1 [file 3415528.f1.pdf]
