# Supplementary material for: p16INK4a Plays Critical Role in Exacerbating Inflammaging in High Fat Diet Induced Skin
Source: Hindawi journal article supplement (doi:10.1155/2022/3415528), 2022-01-01

**Figure S2 High fat diet induced increased inflammation and SASP secretion**

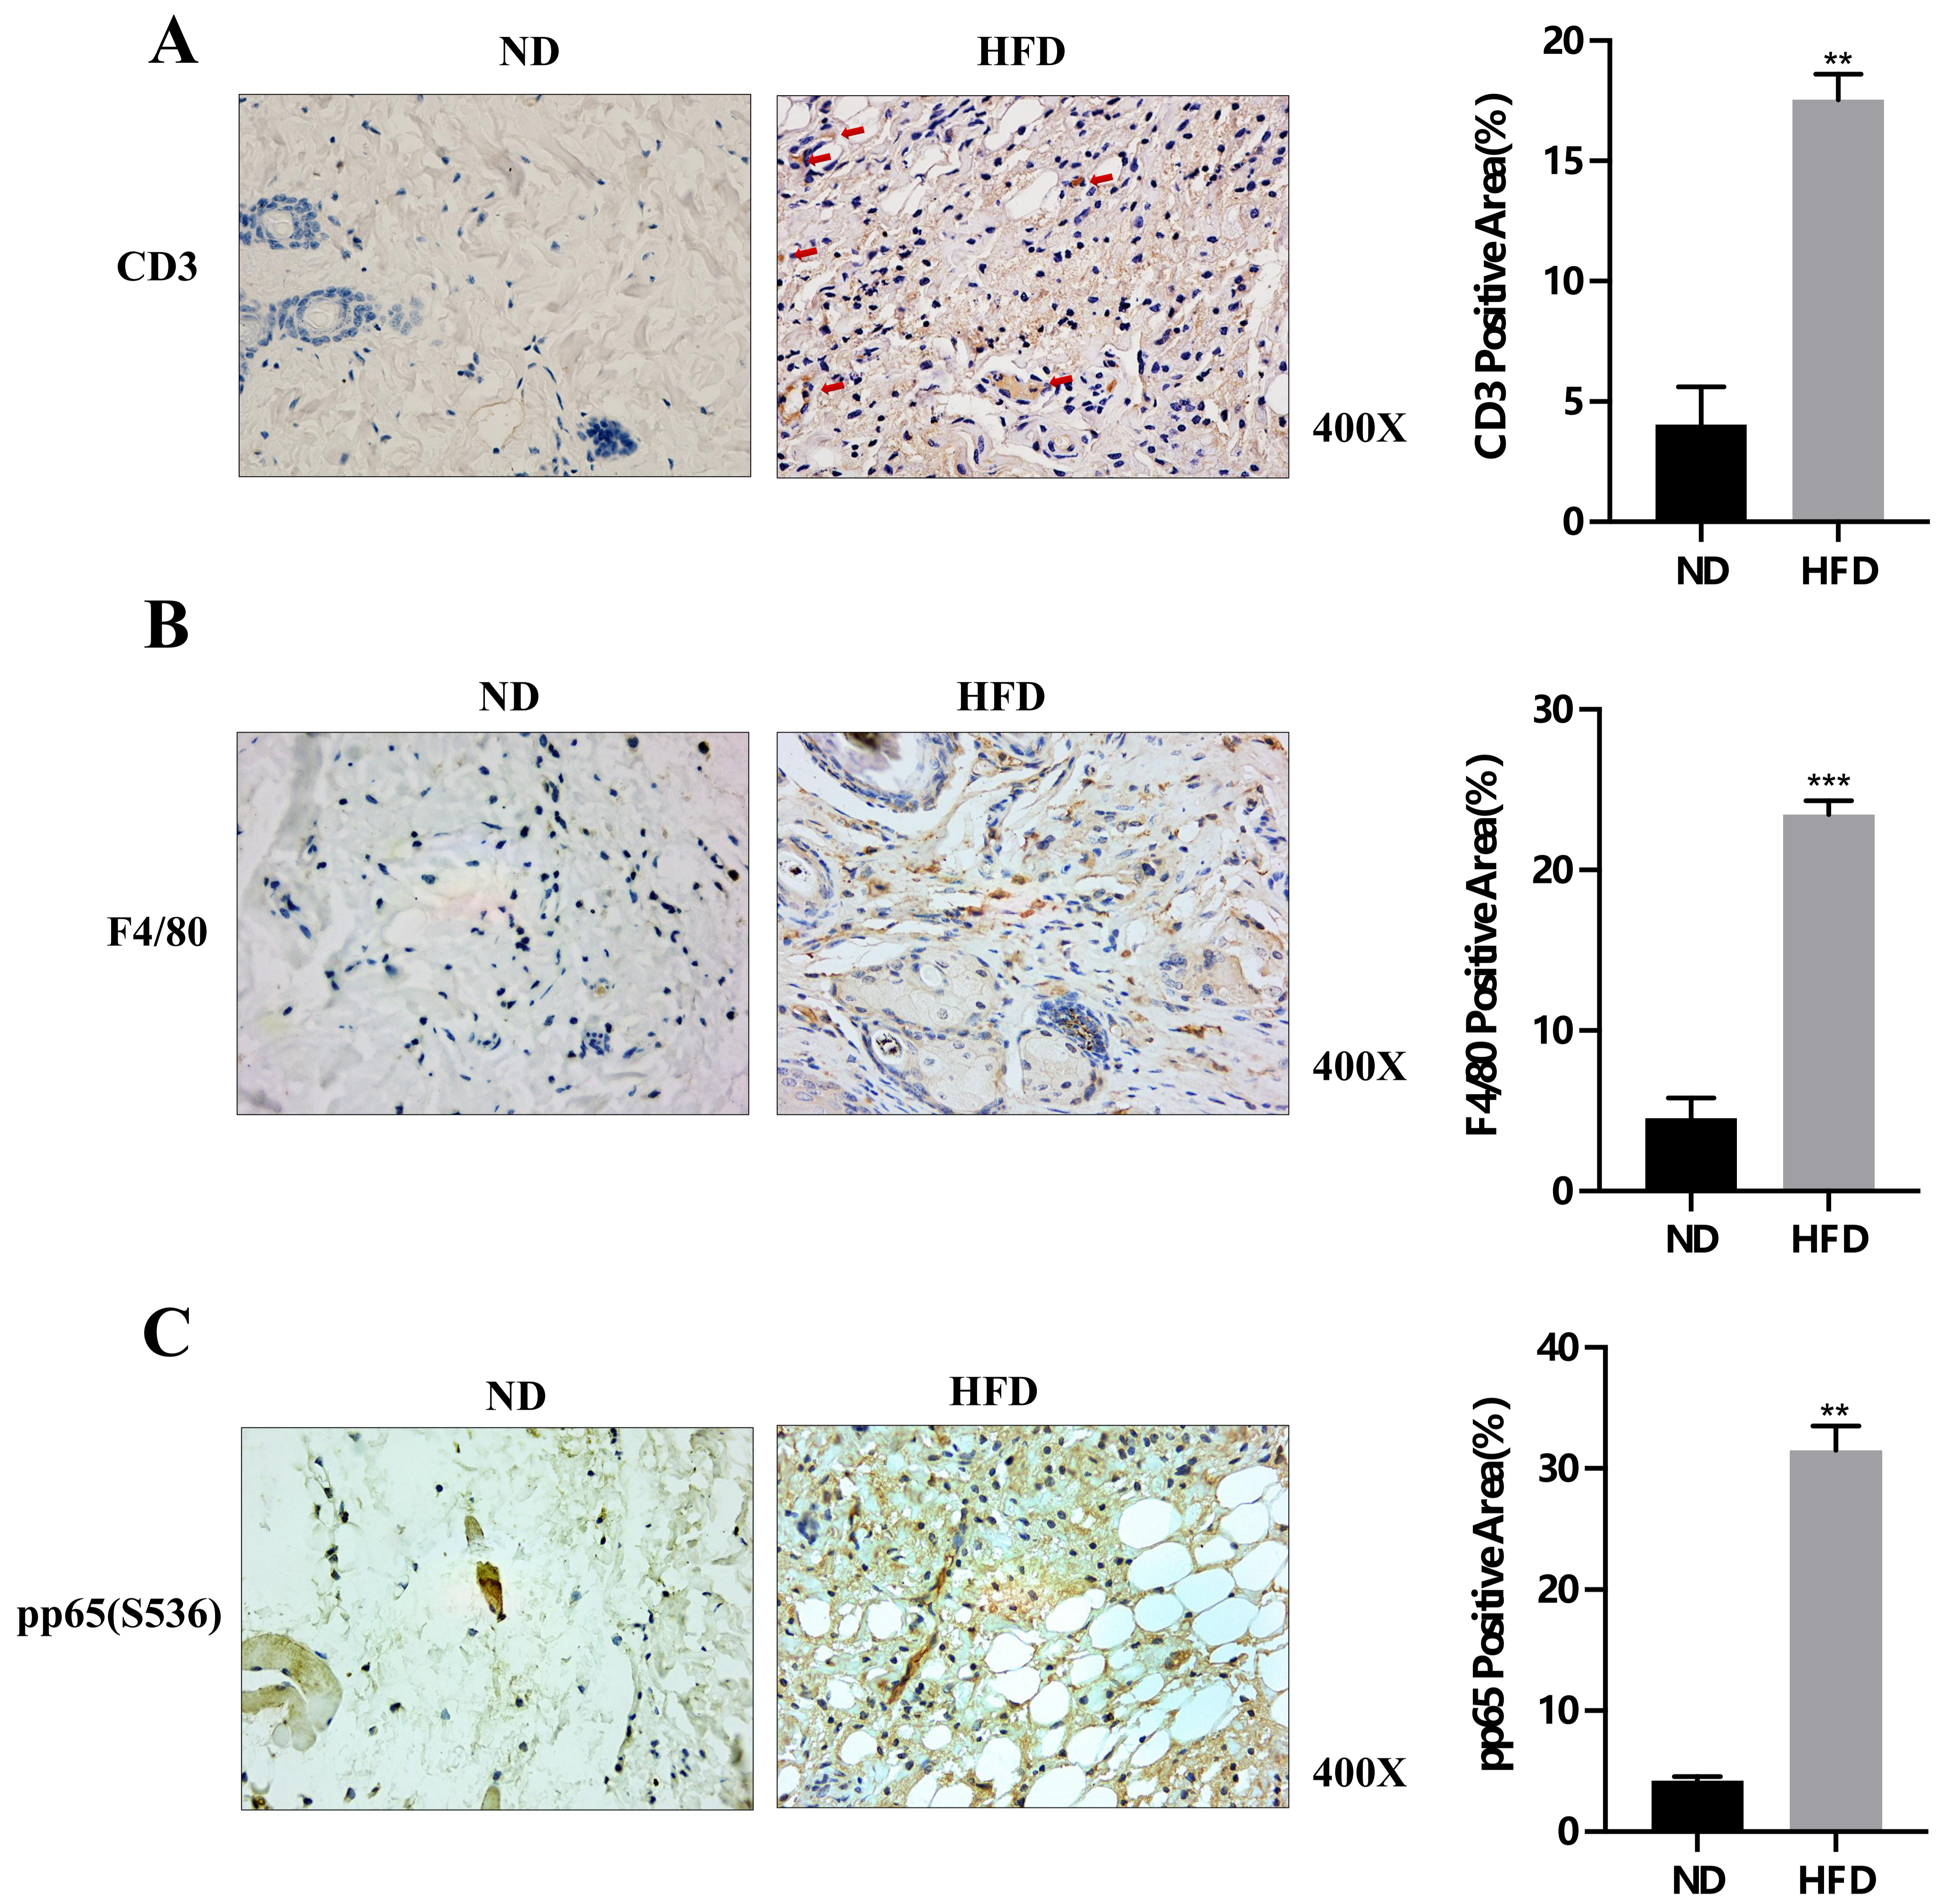

Supplement: f2 [file 3415528.f2.pdf]
