# Supplementary material for: p16INK4a Plays Critical Role in Exacerbating Inflammaging in High Fat Diet Induced Skin
Source: Hindawi journal article supplement (doi:10.1155/2022/3415528), 2022-01-01

**Figure S3** p16 increased expression level of ApoE in HDFs after inducing steatosis

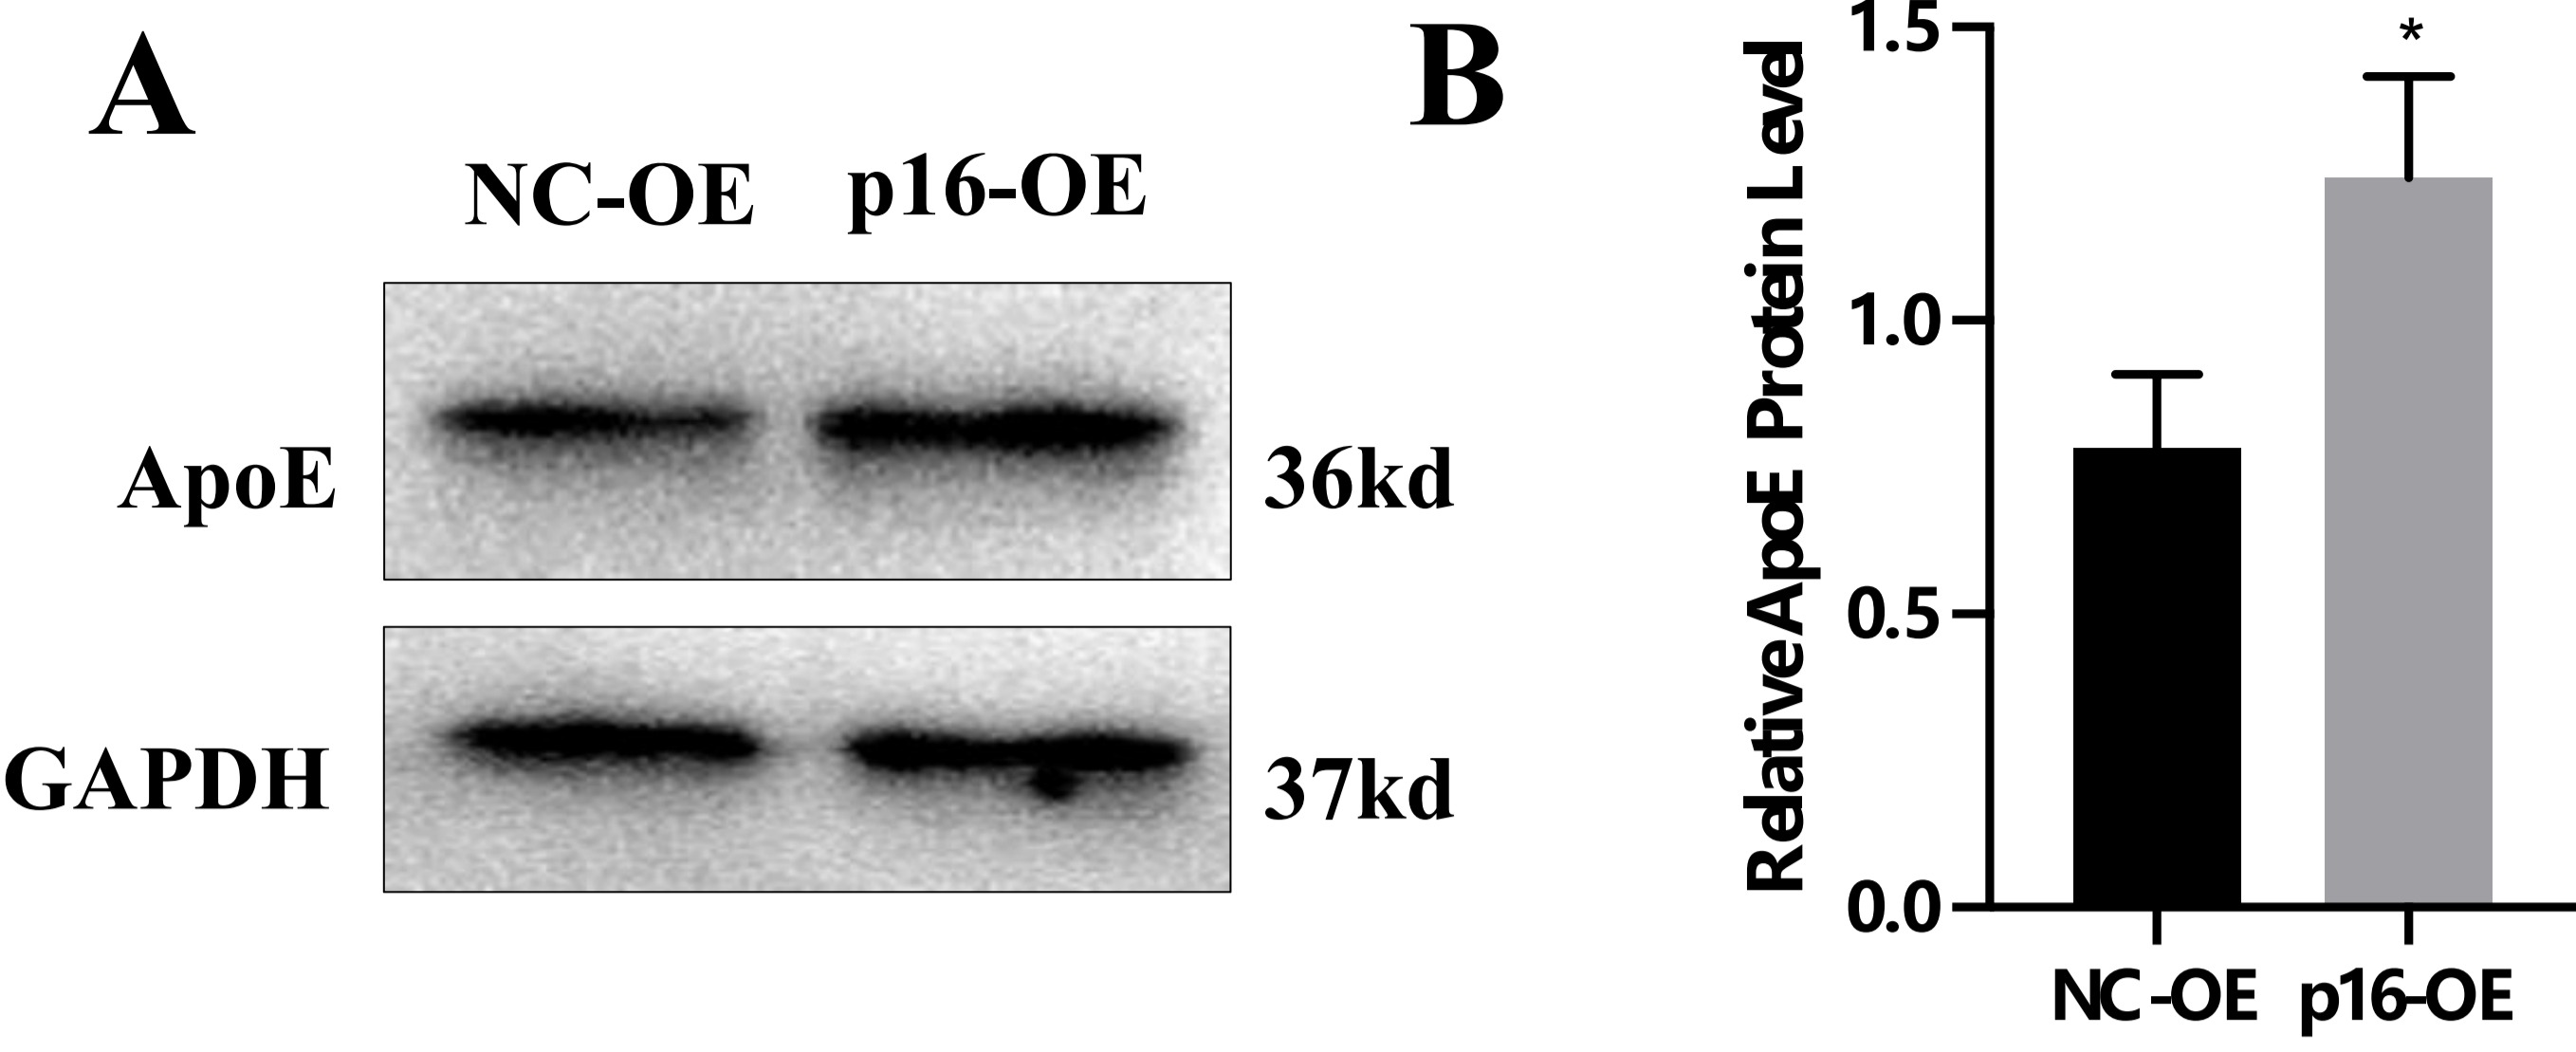

Supplement: f3 [file 3415528.f3.pdf]
