# Supplementary material for: p16INK4a Plays Critical Role in Exacerbating Inflammaging in High Fat Diet Induced Skin
Source: Hindawi journal article supplement (doi:10.1155/2022/3415528), 2022-01-01

**Figure S4 p16 knockout alleviated activation of intergrin-inflammasome pathway**

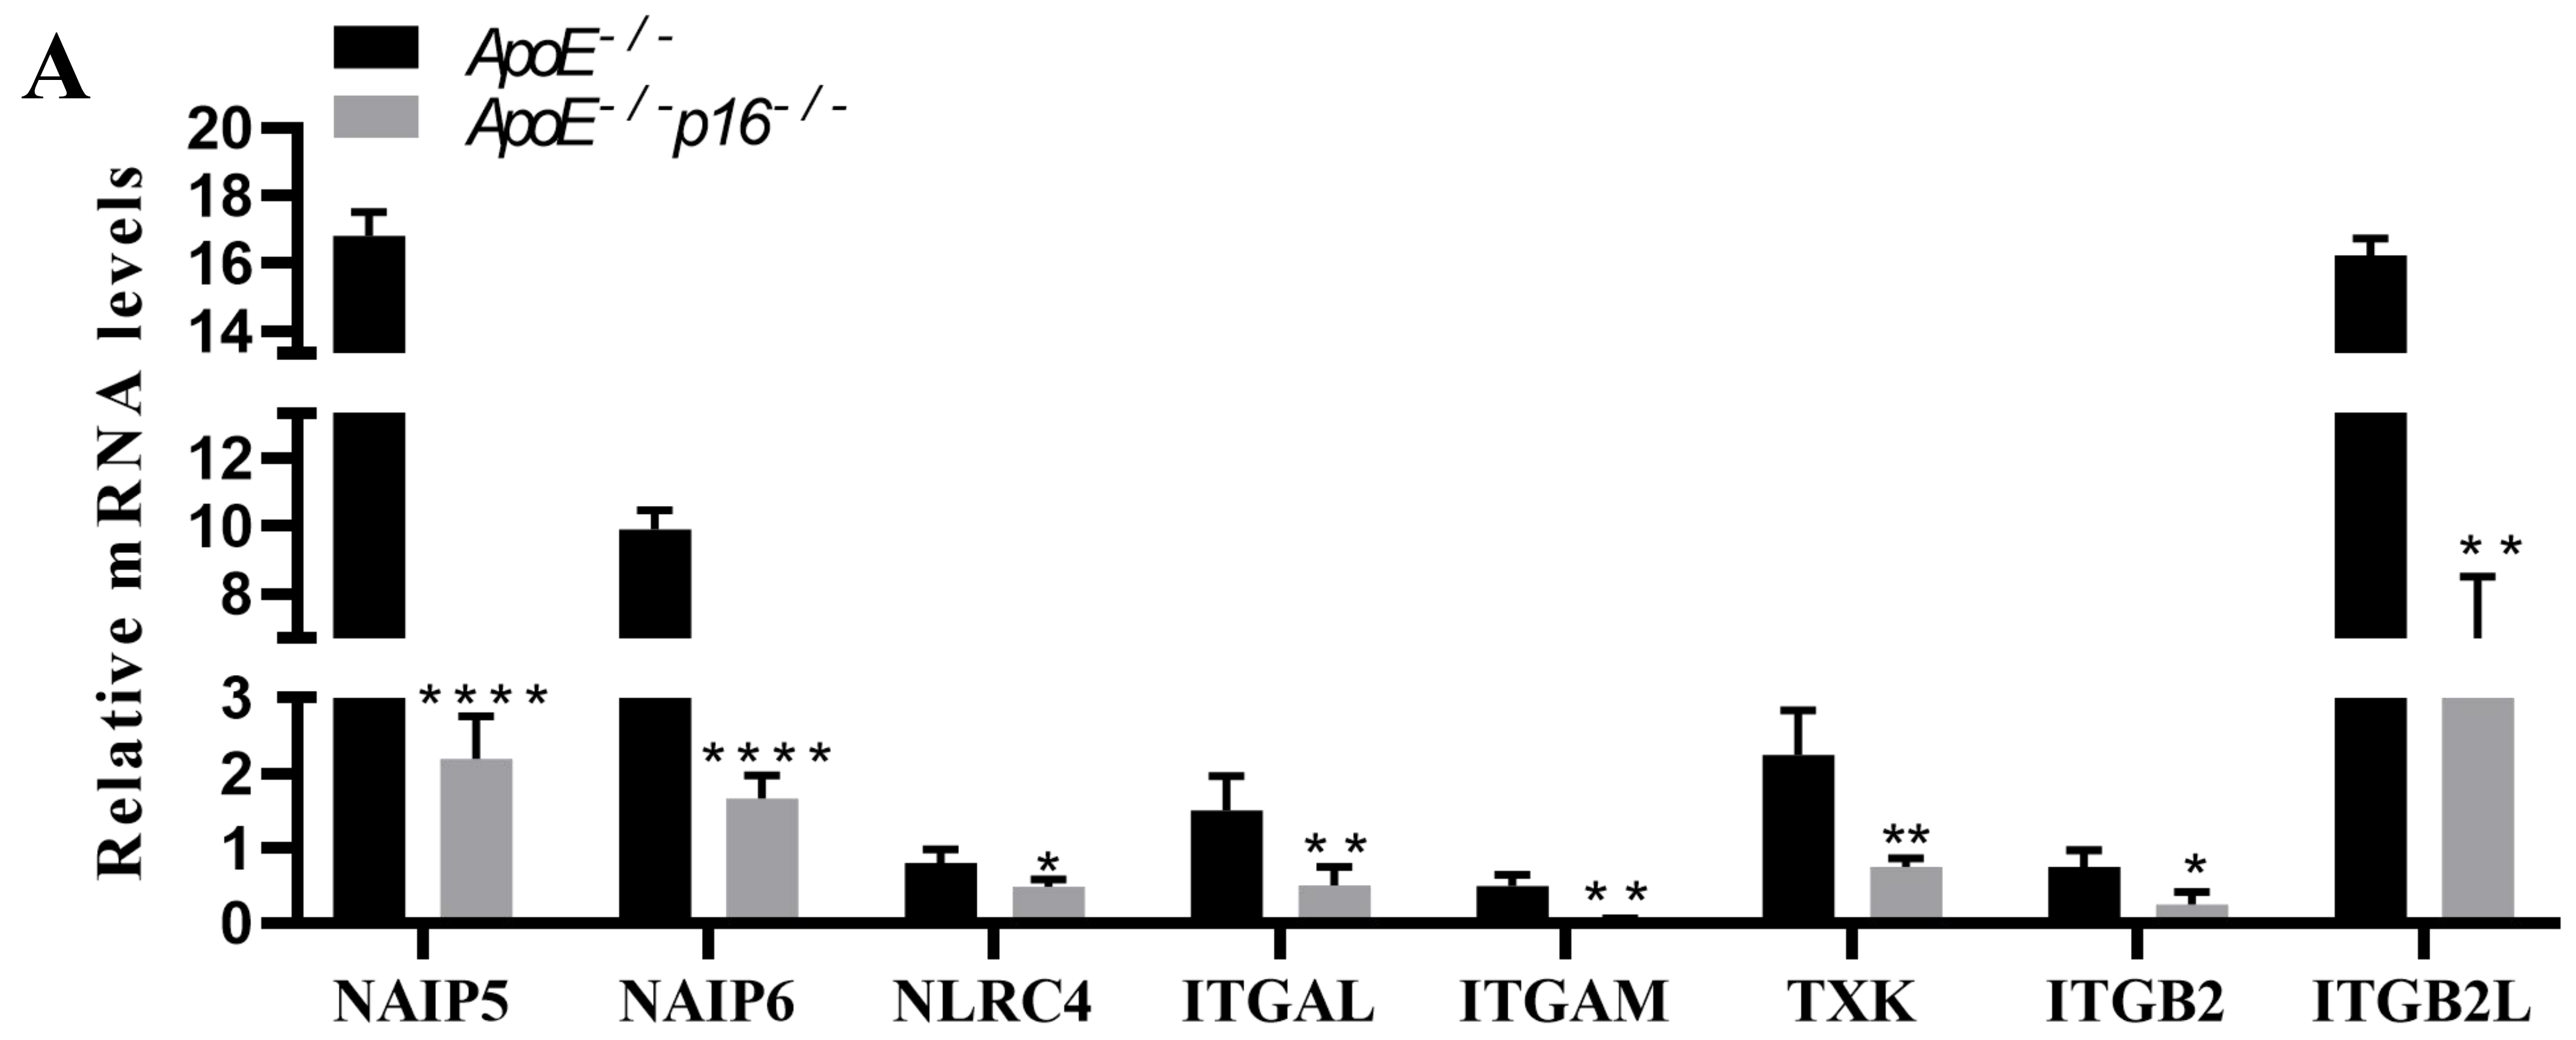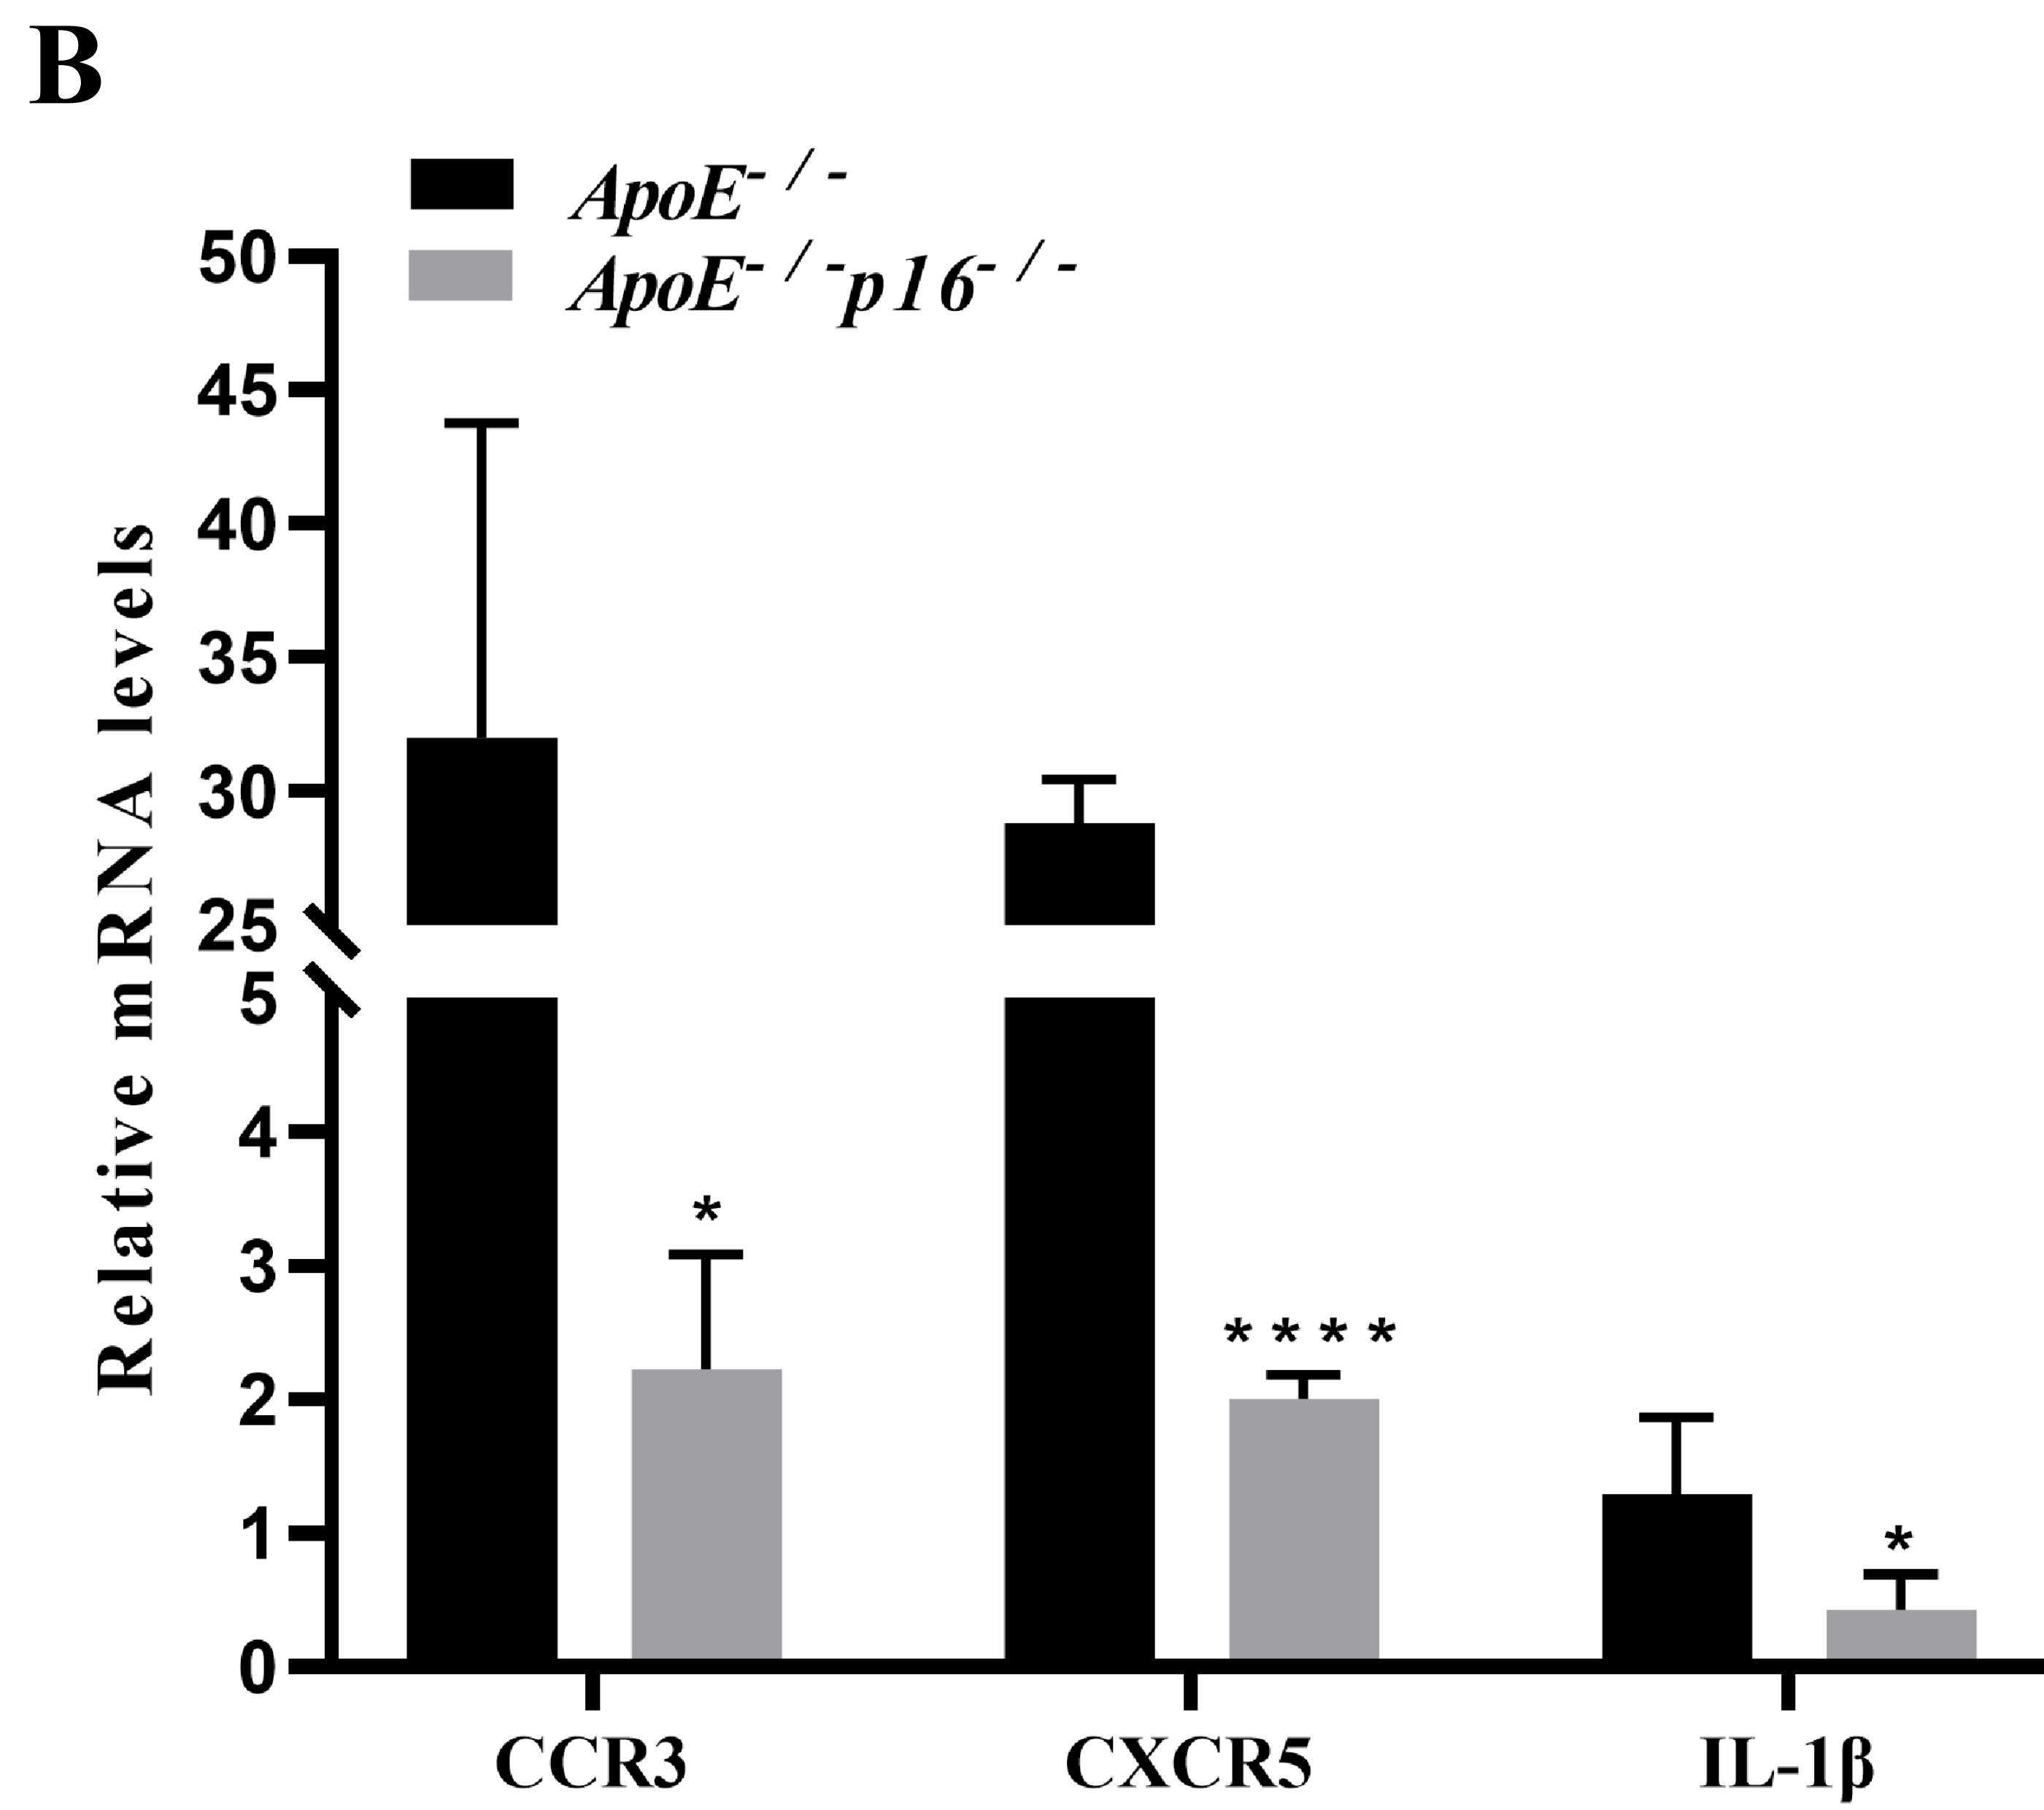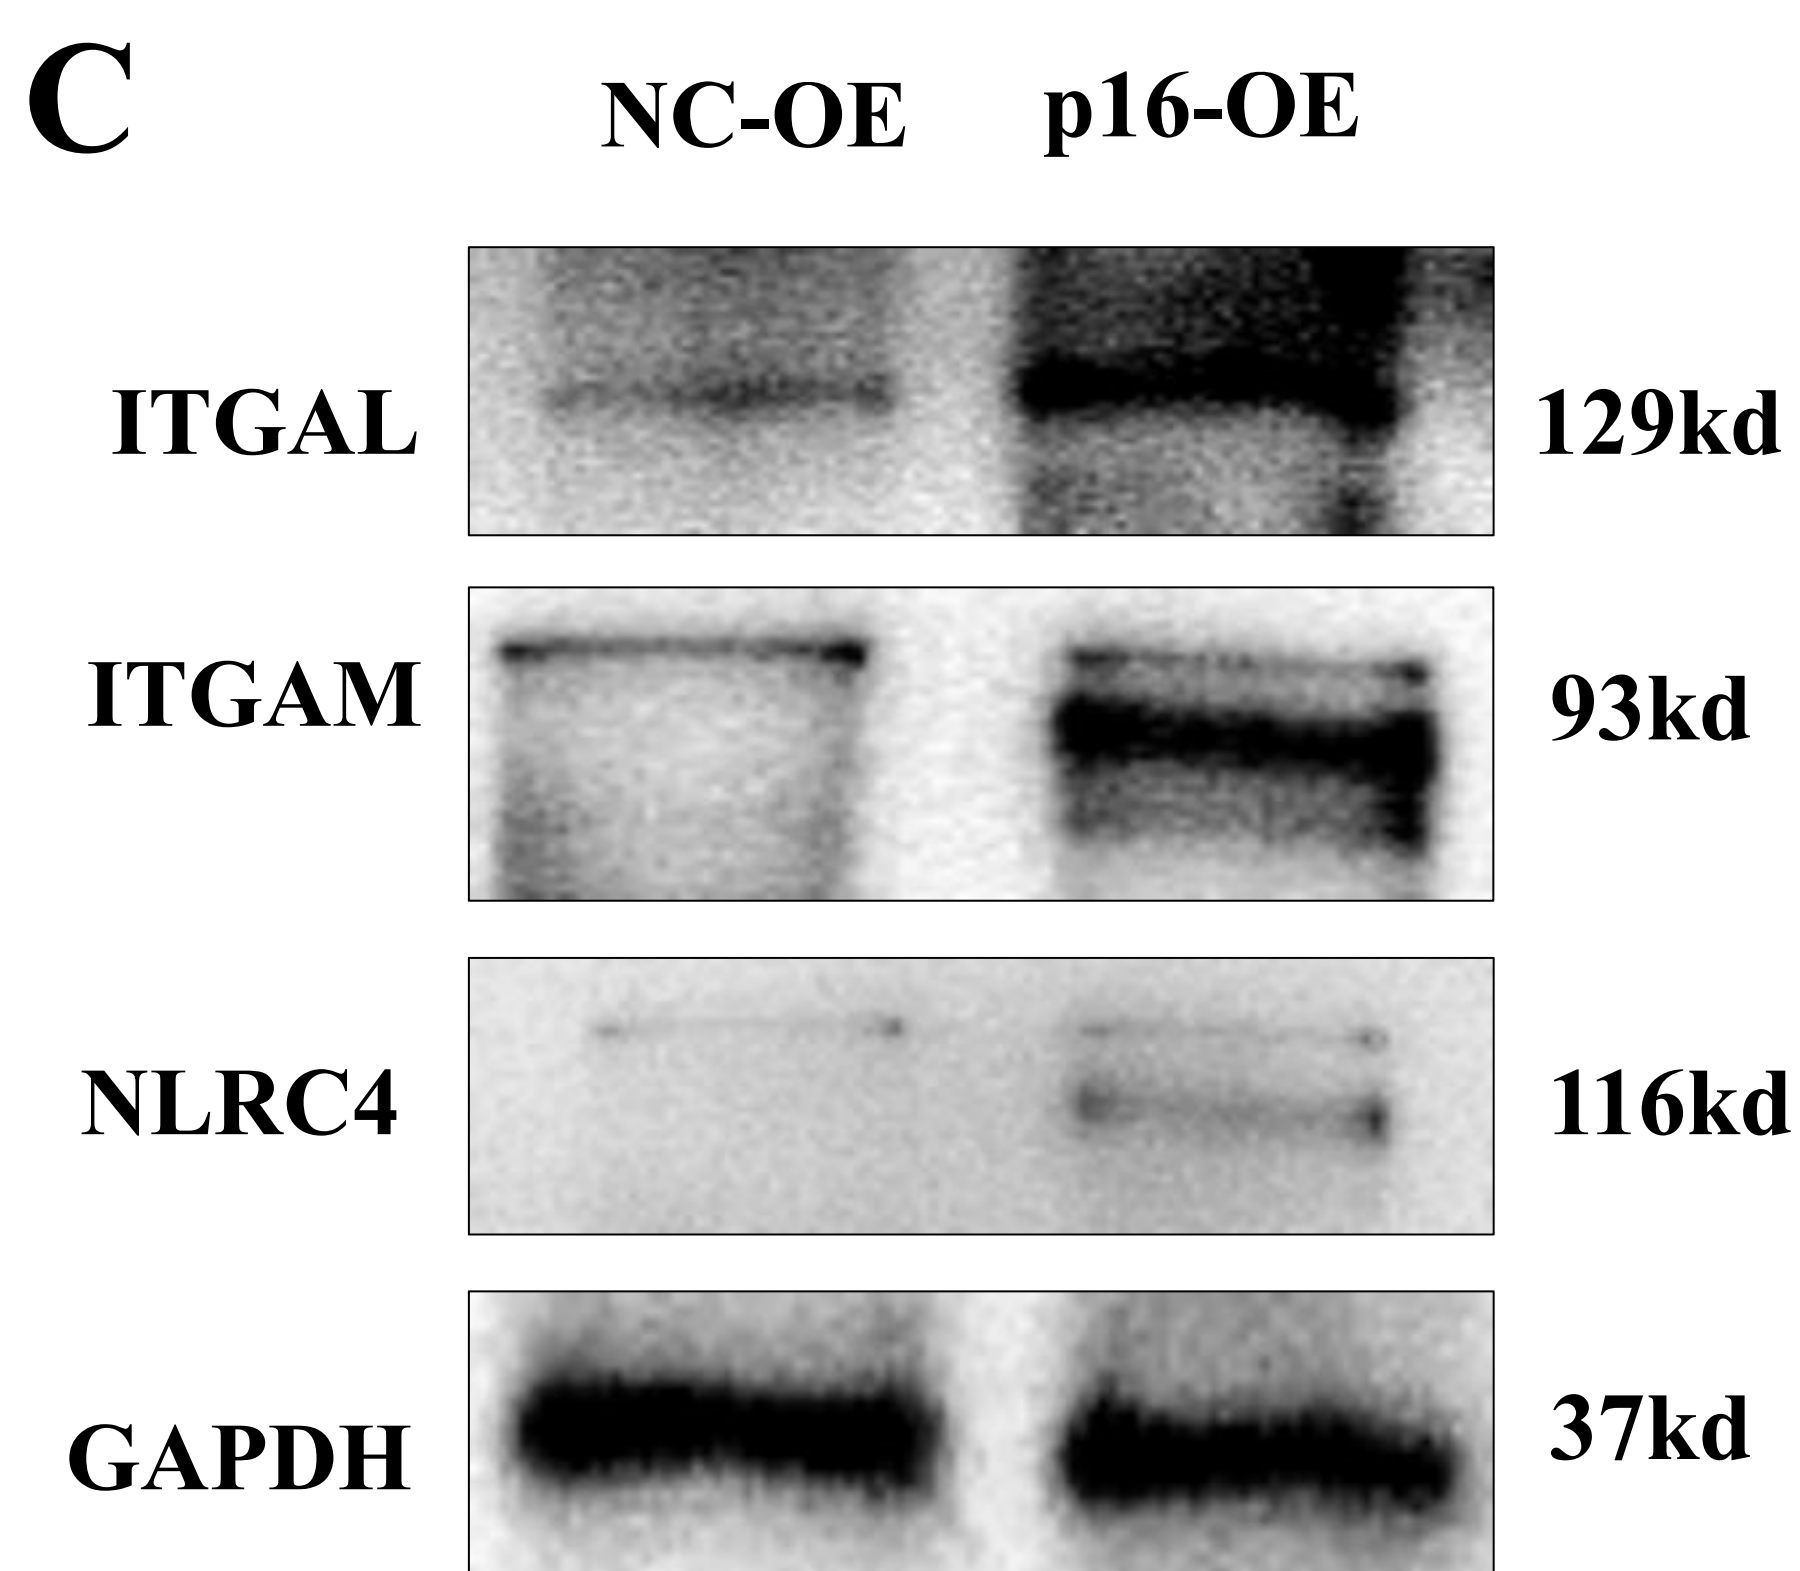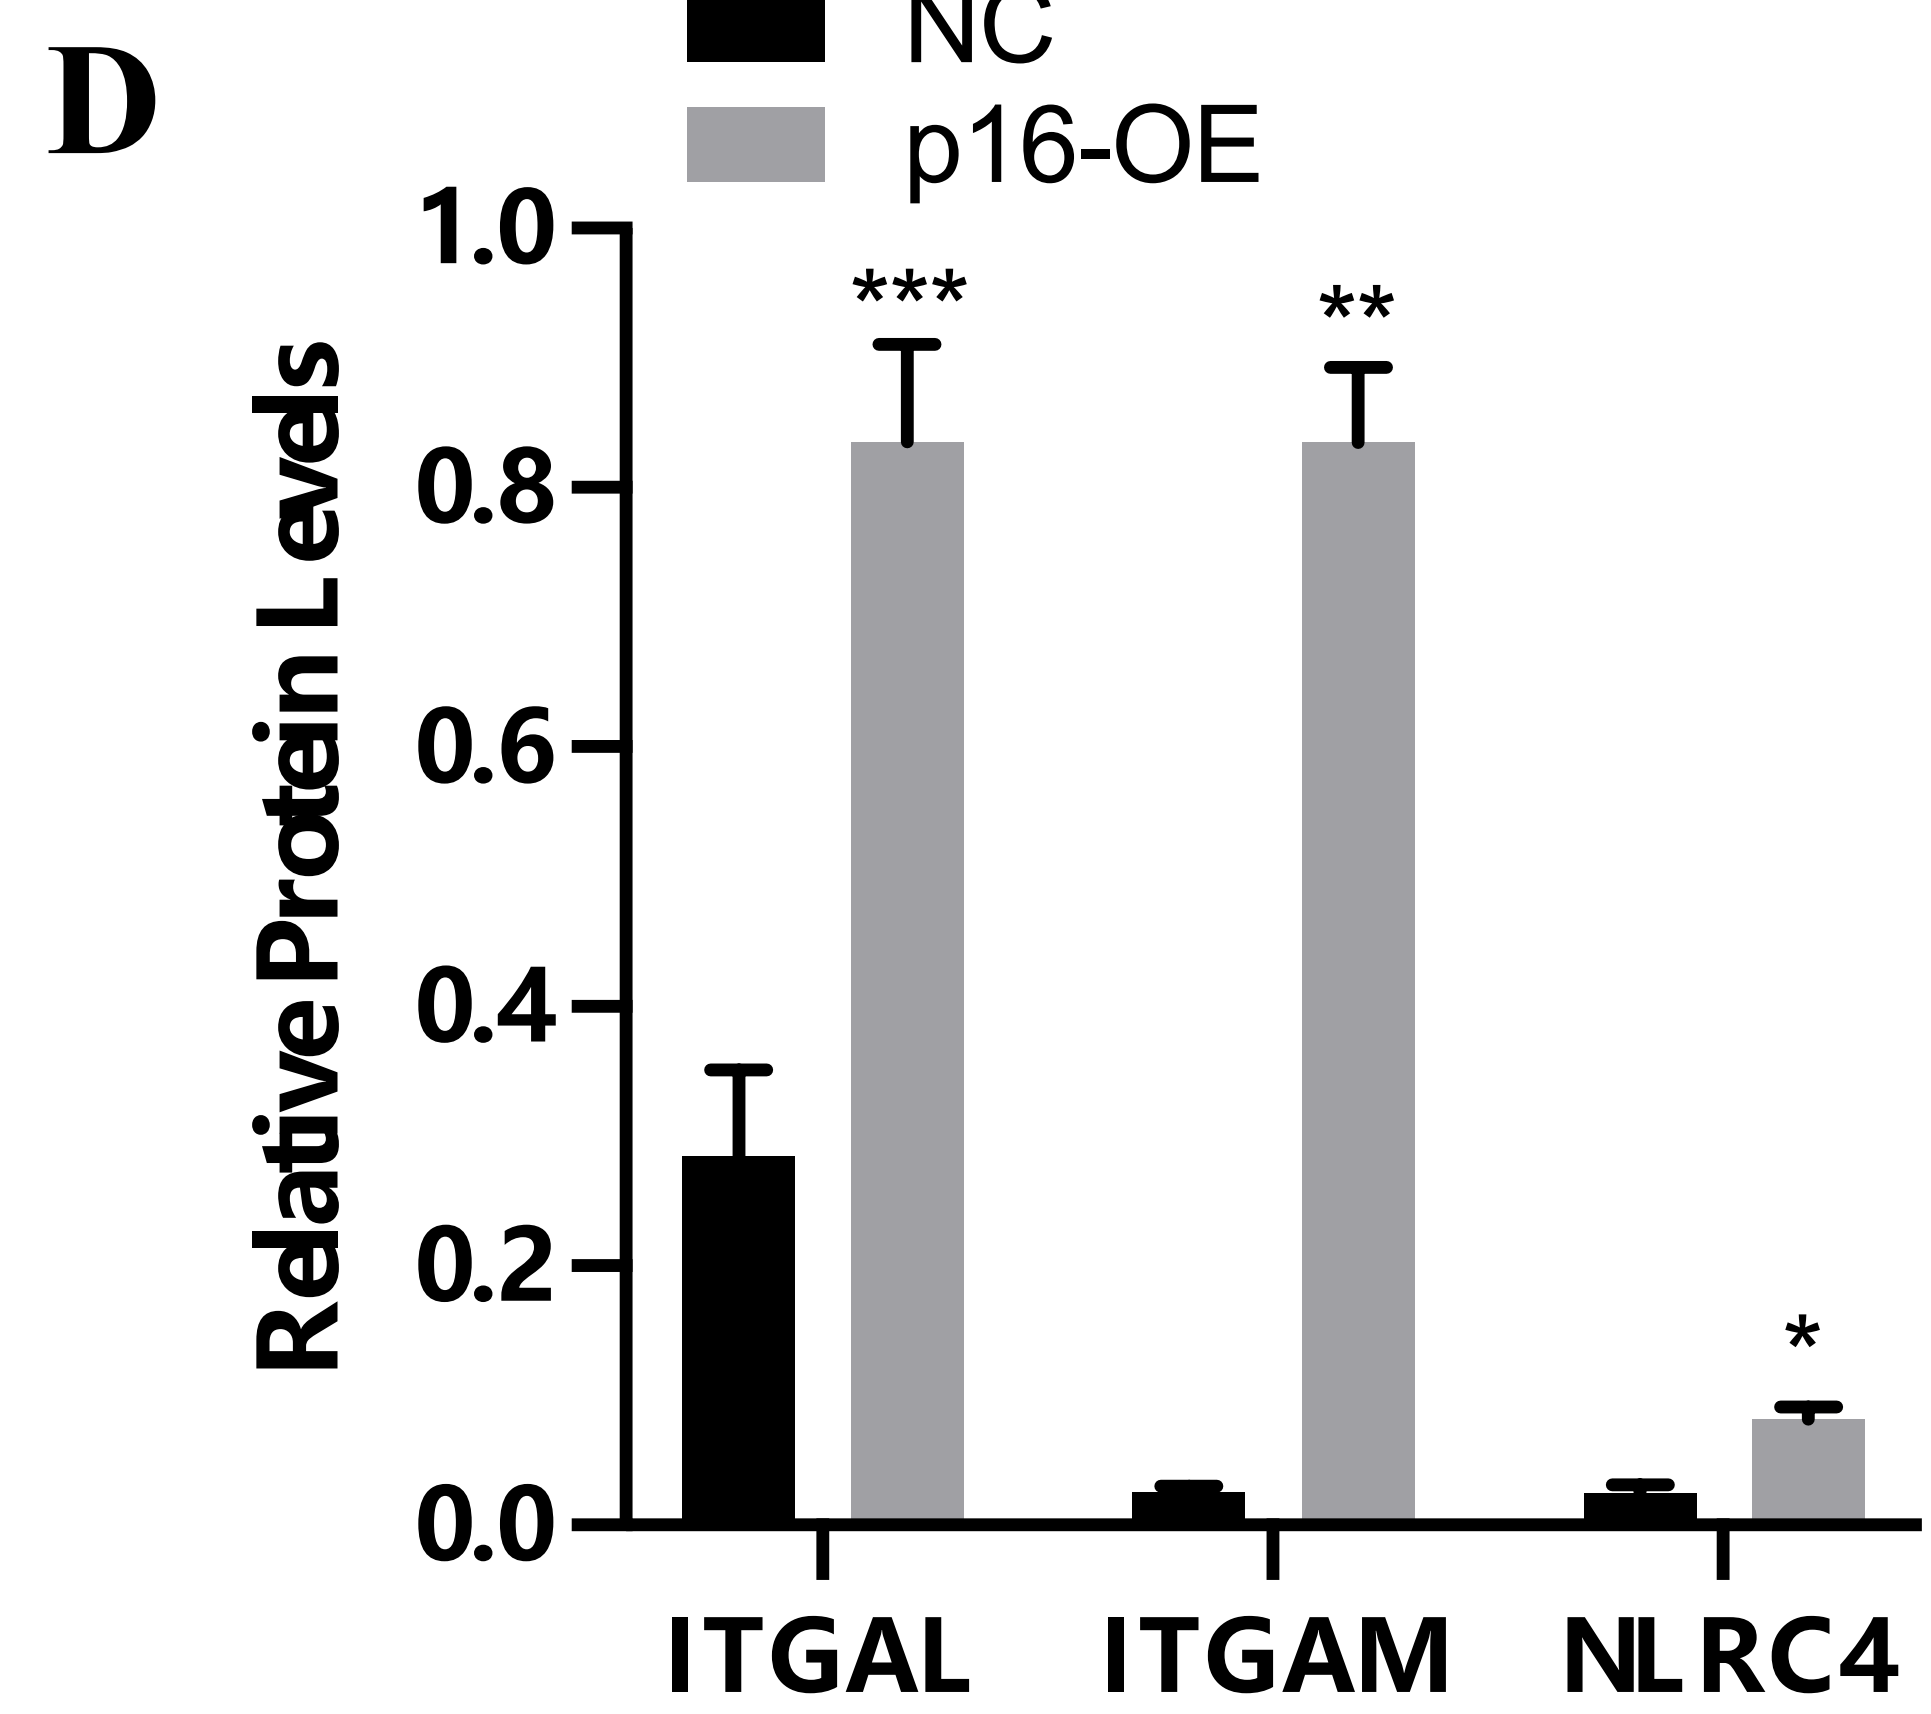

Supplement: f4 [file 3415528.f4.pdf]
