# Supplementary material for: p16INK4a Plays Critical Role in Exacerbating Inflammaging in High Fat Diet Induced Skin
Source: Hindawi journal article supplement (doi:10.1155/2022/3415528), 2022-01-01

**Figure S5** p16 knockout alleviated activation of intergrin-inflammasome pathway and inflammaging induced by high fat diet

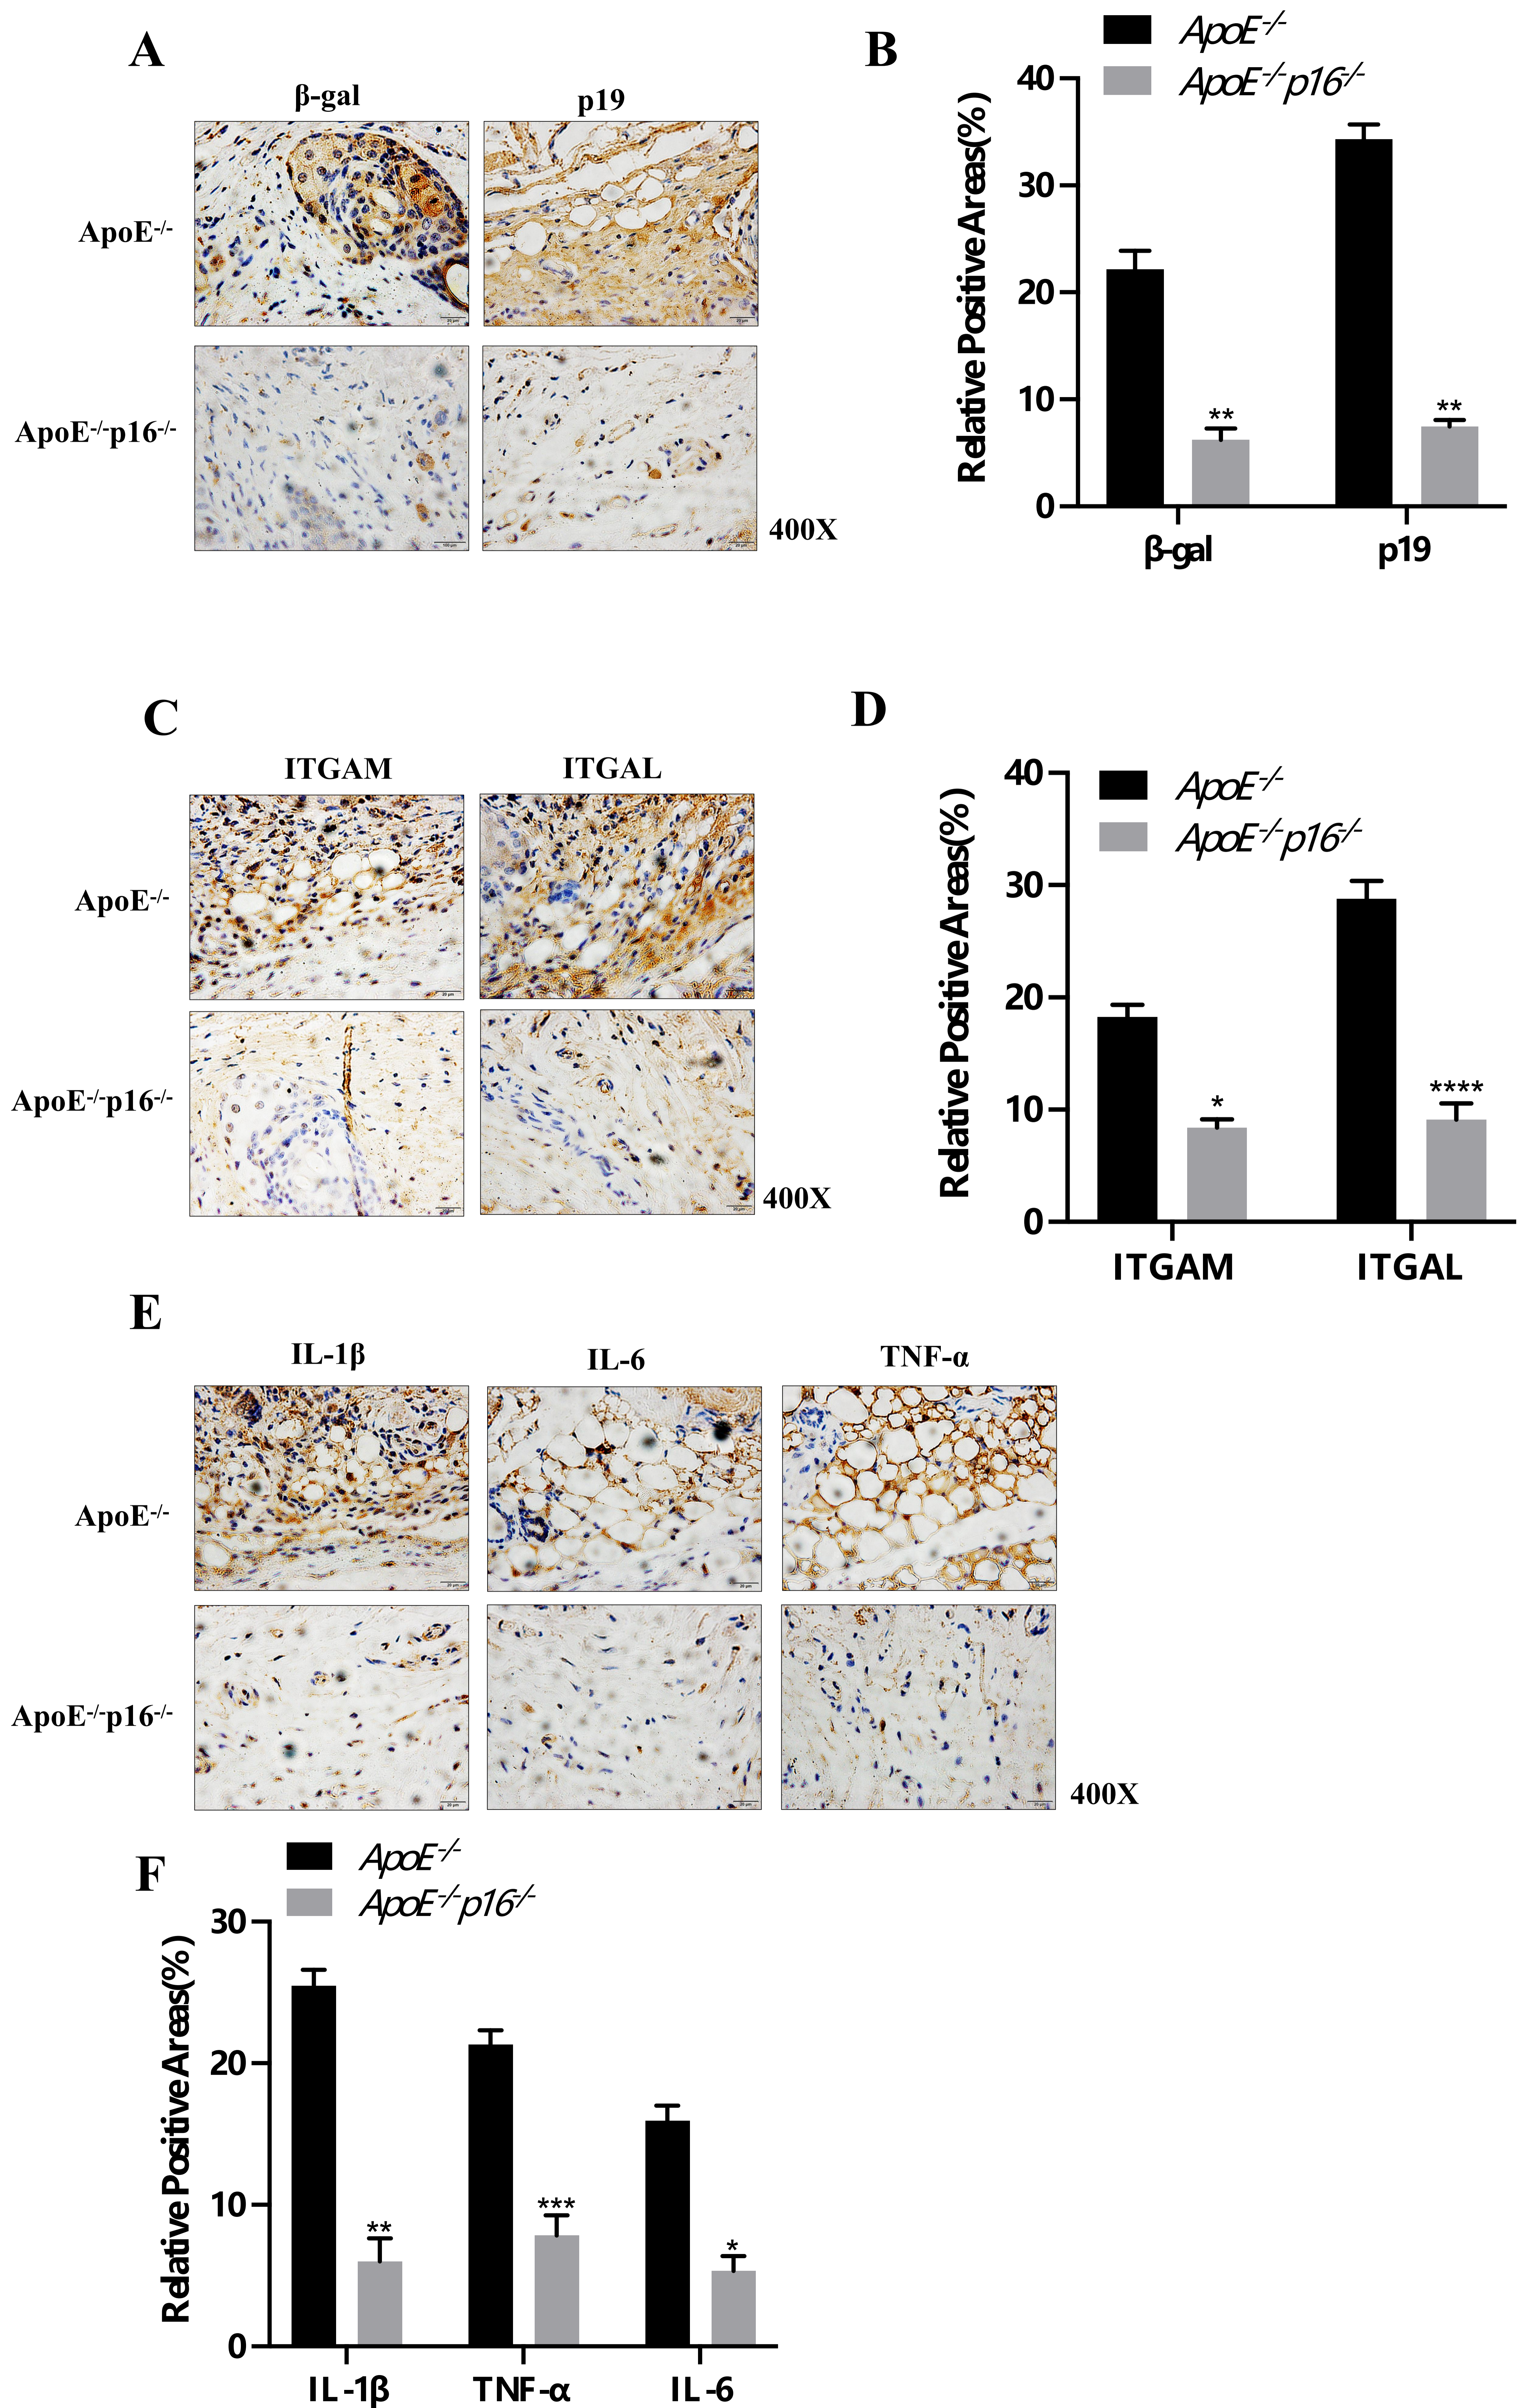

Supplement: f5 [file 3415528.f5.pdf]
