# Supplementary material for: p16INK4a Plays Critical Role in Exacerbating Inflammaging in High Fat Diet Induced Skin
Source: Hindawi journal article supplement (doi:10.1155/2022/3415528), 2022-01-01

# Figure S6 Knockdown of ITGAL and ITGAM could rescued activation of NLRP3 and NLRC4 inflammasome pathway after p16-overexpression

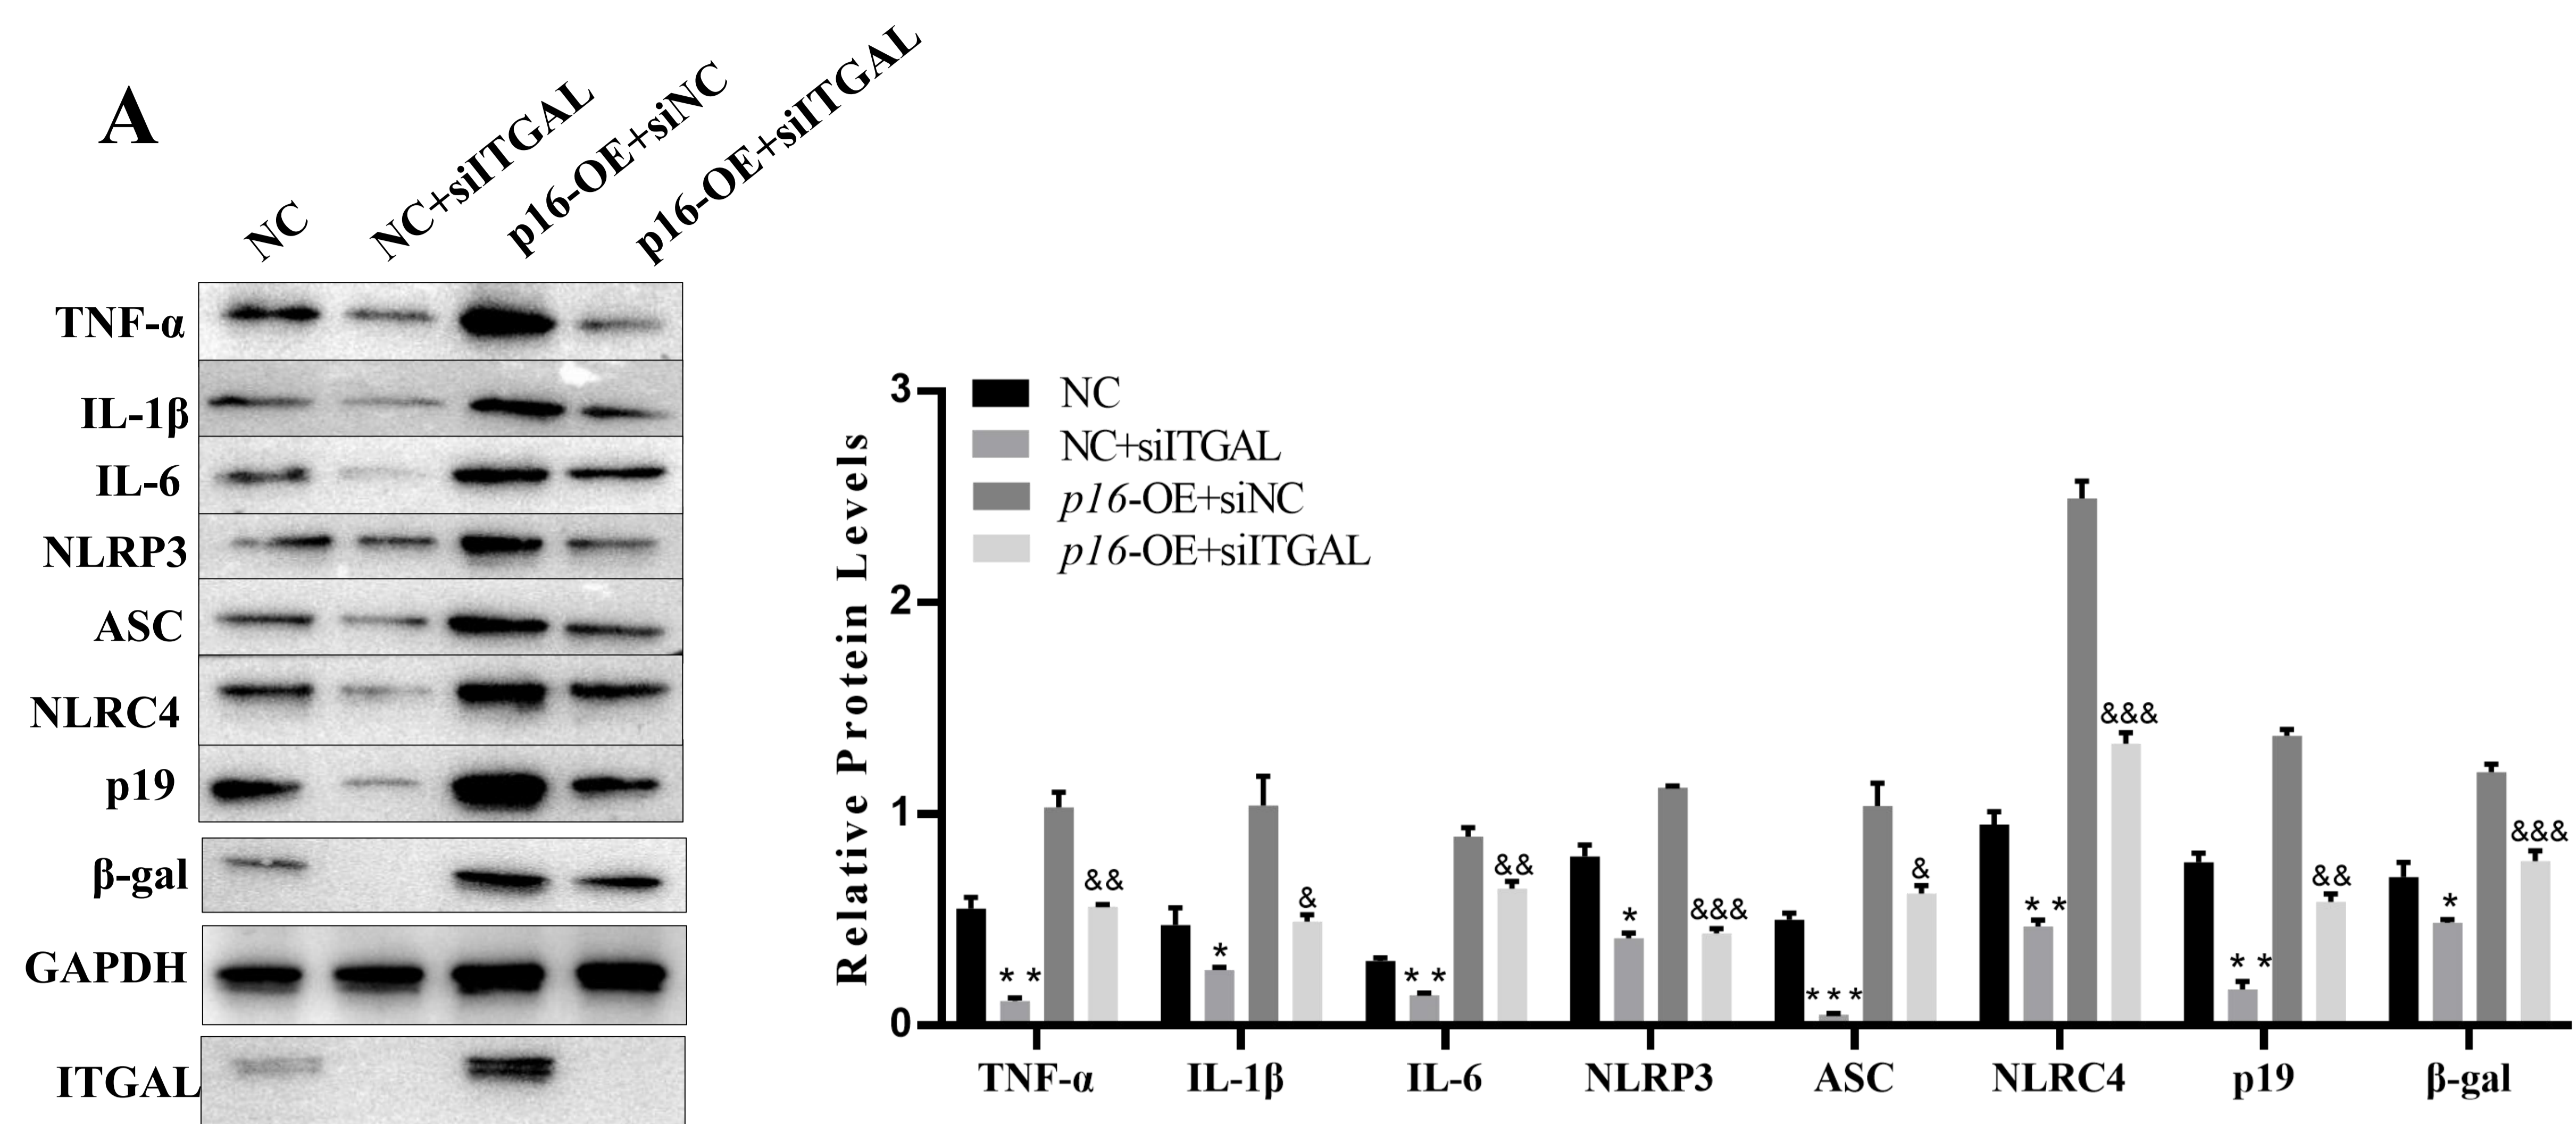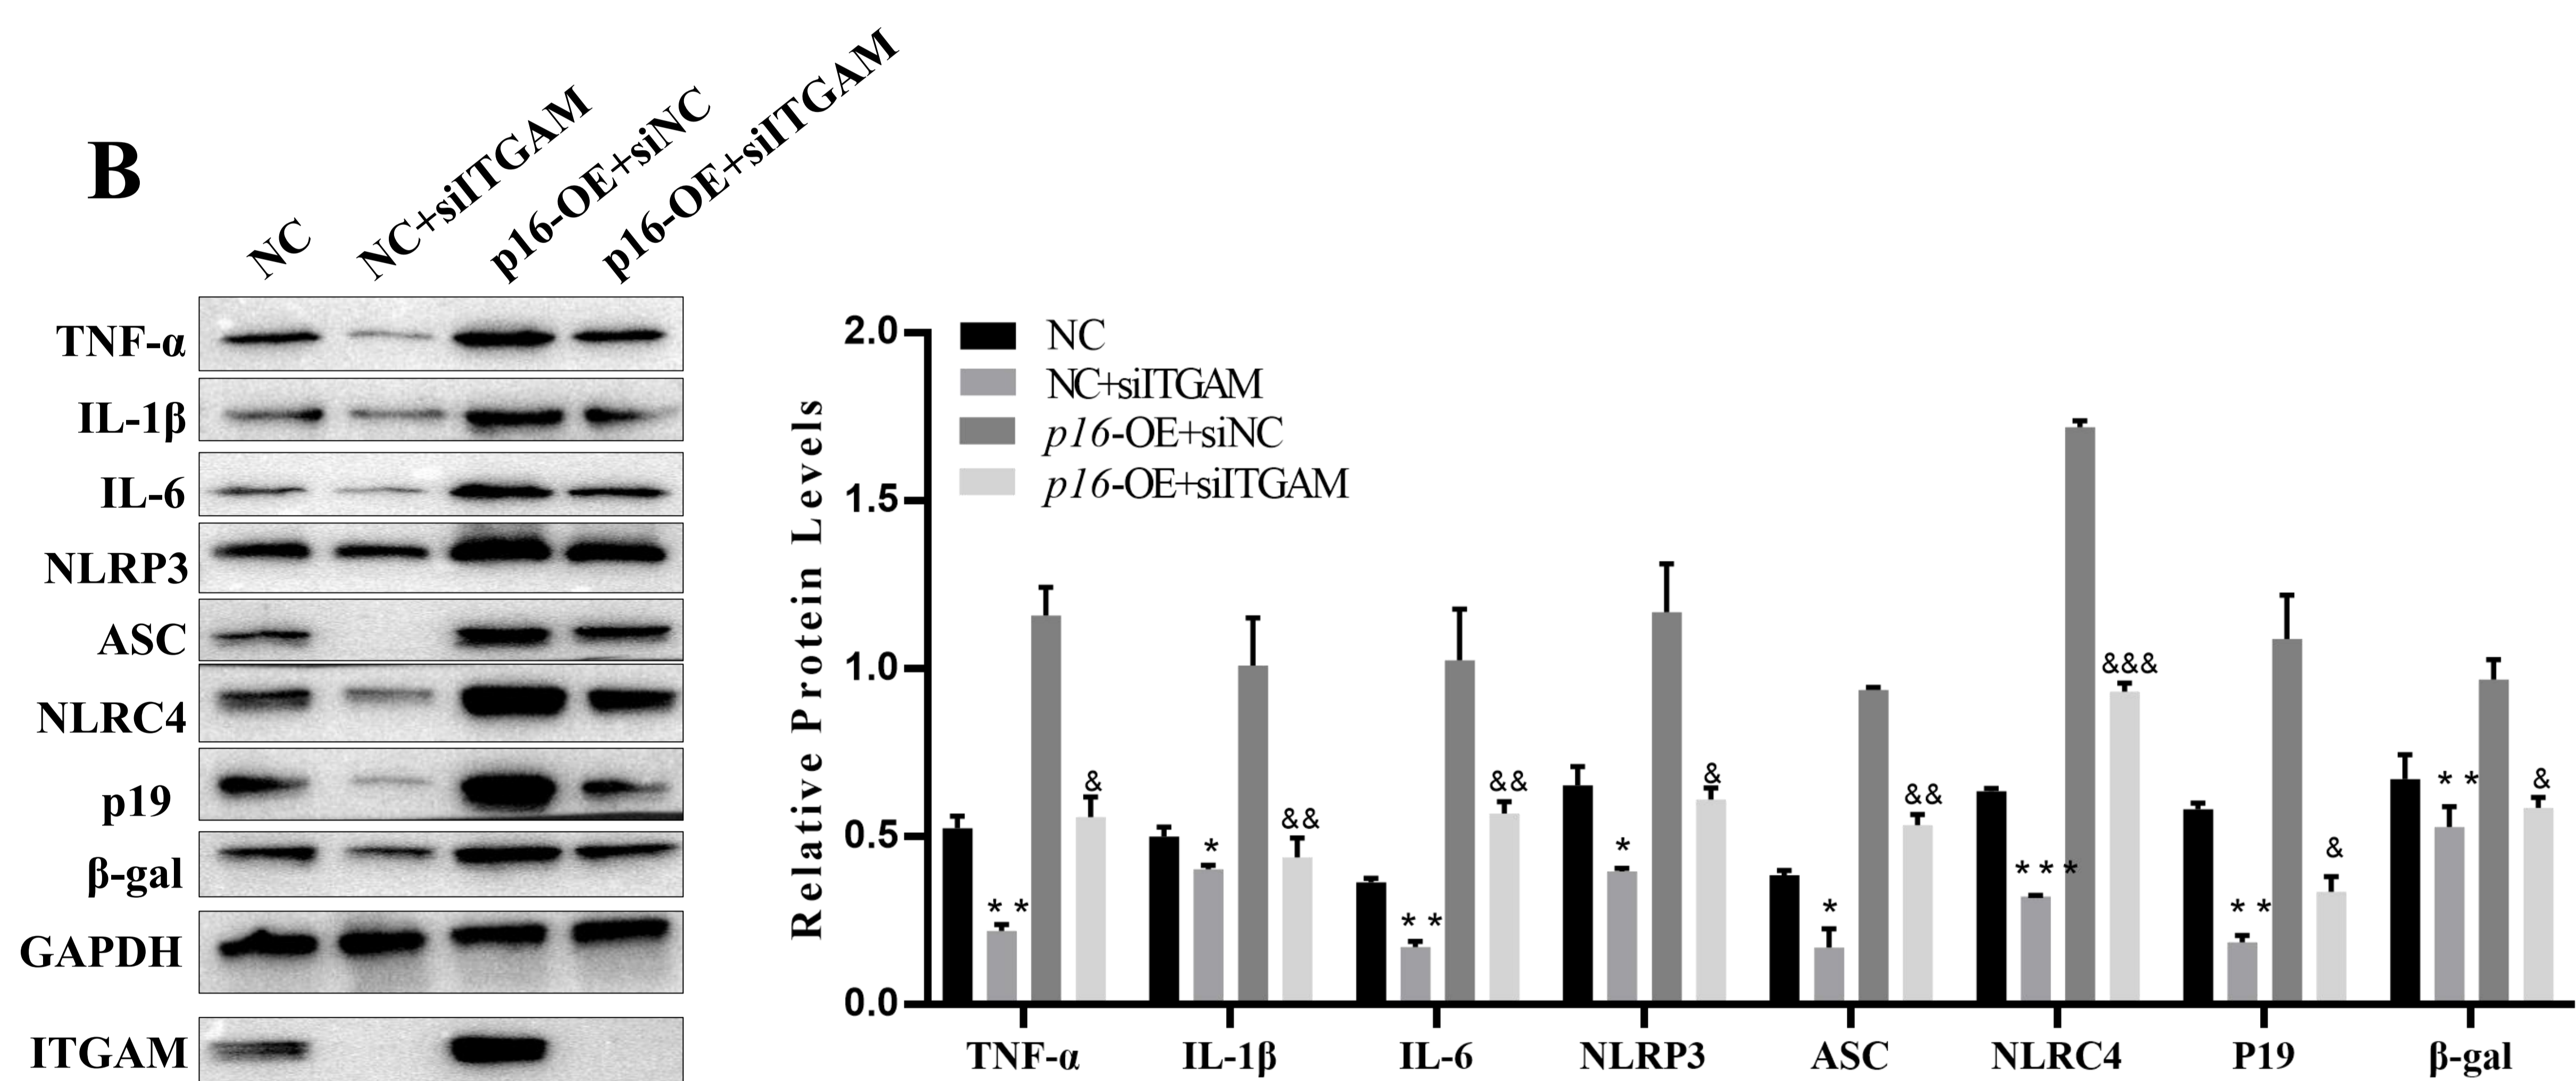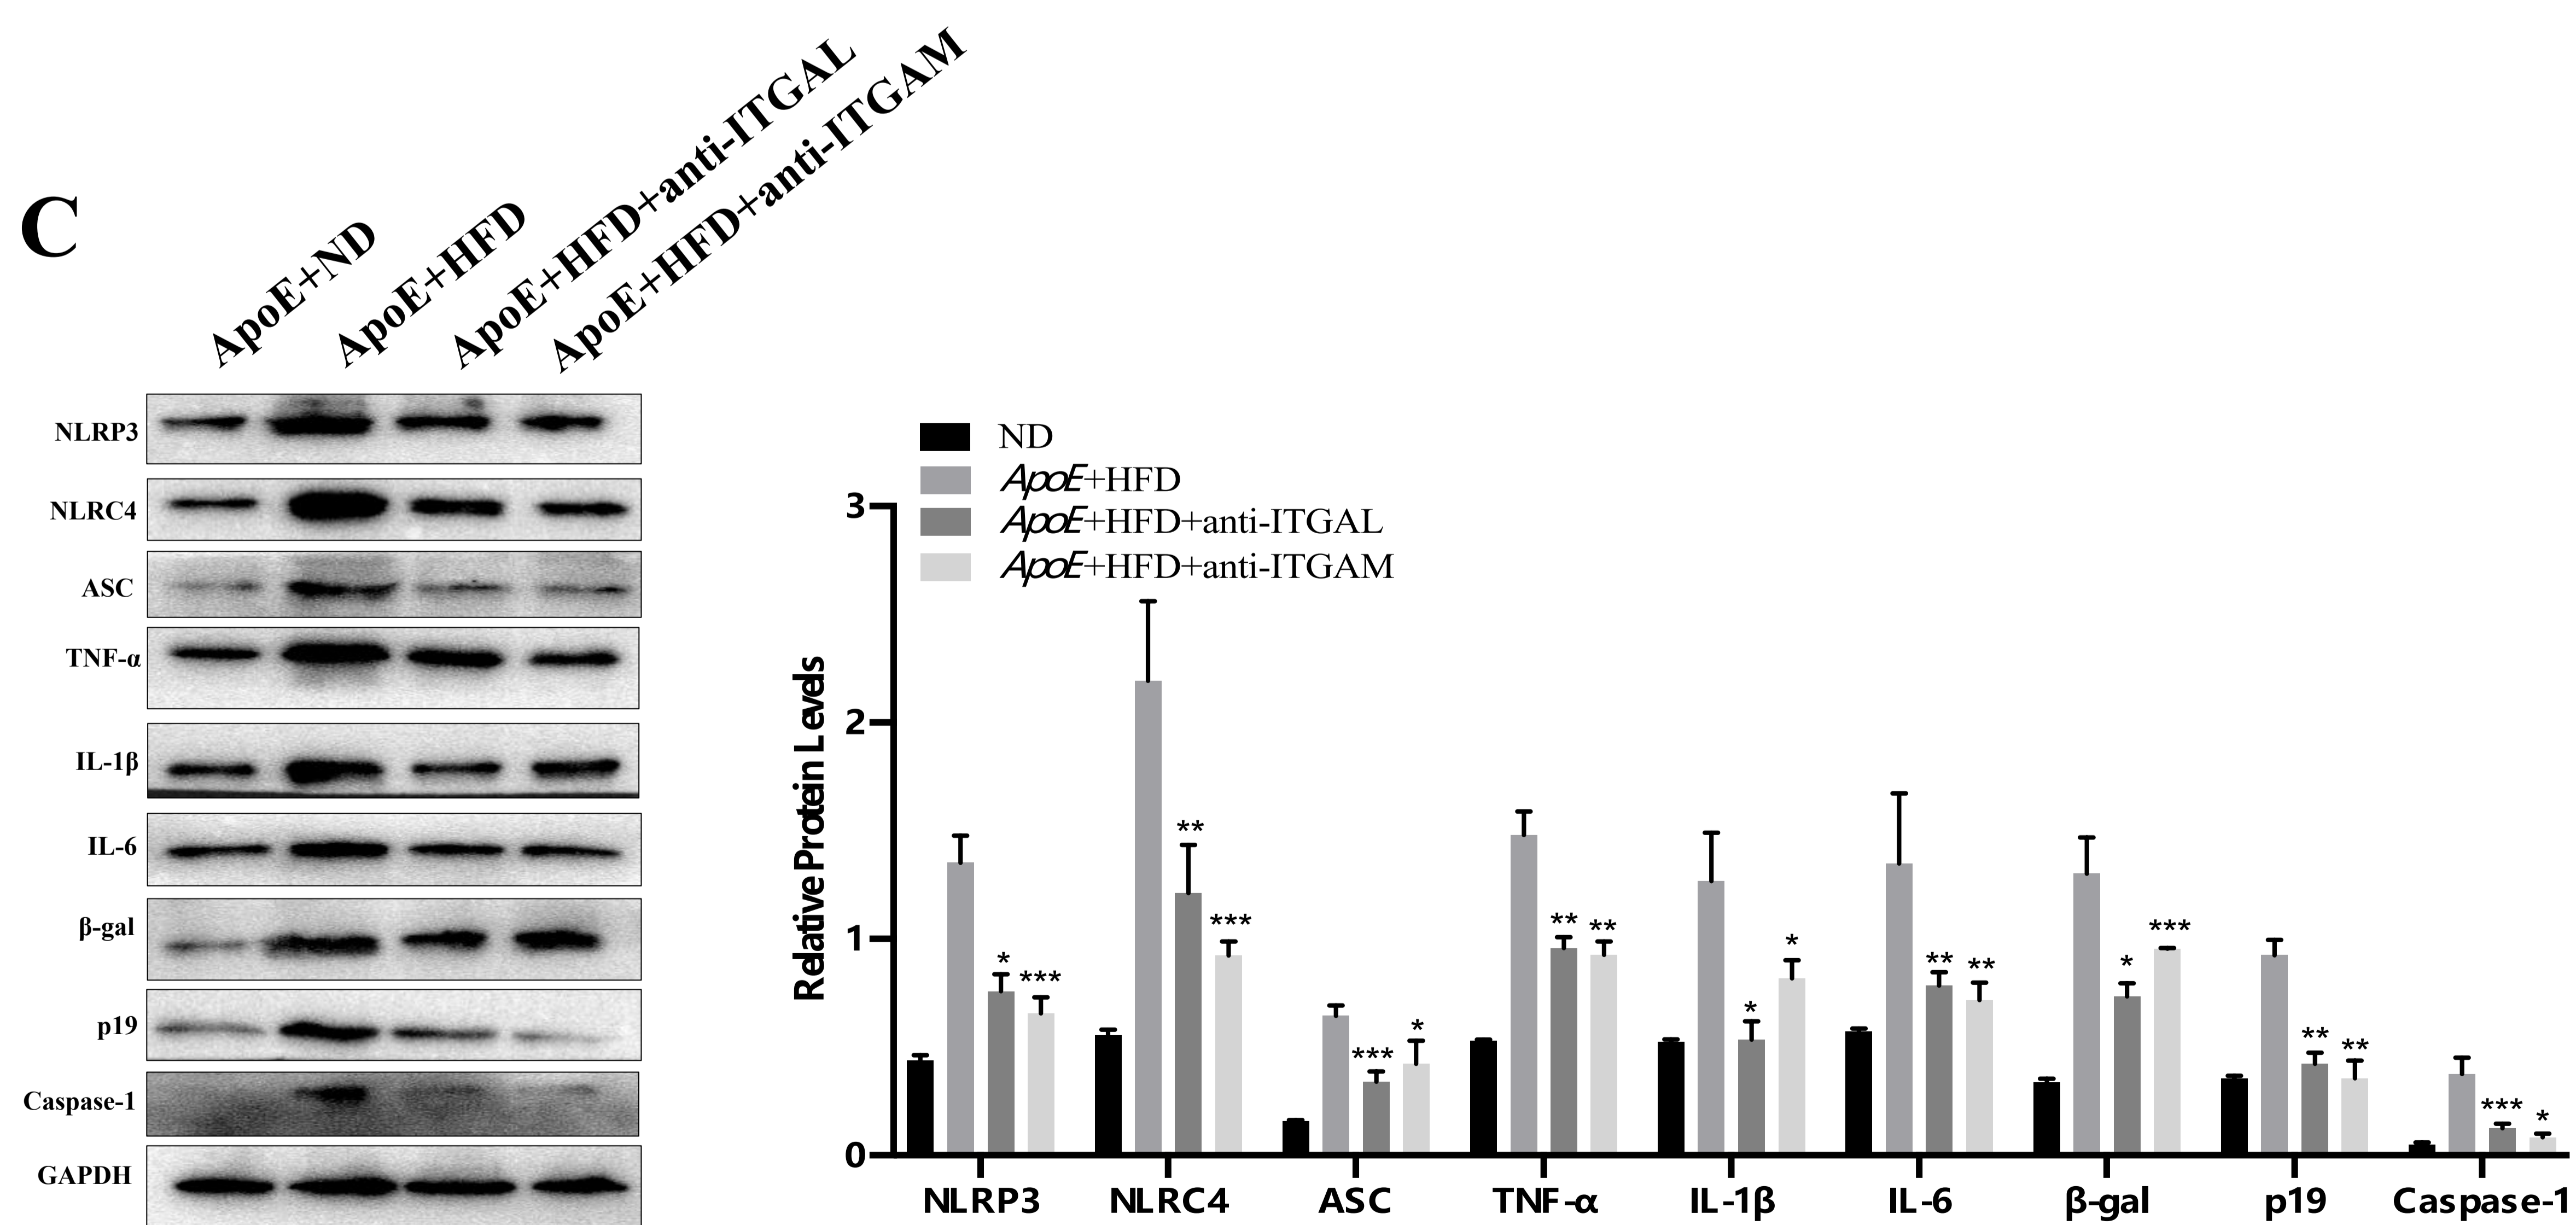

Supplement: f6 [file 3415528.f6.pdf]
